# Supplementary material for: Cu(i)-catalyzed intramolecular oxidative C–H amination of 2-aminoacetophenones: a convenient route toward isatins
Source: Royal Society of Chemistry journal article supplement (doi:10.1039/c3cc44435j), 2013-01-01

# **Cu(I)-Catalyzed Intramolecular Oxidative C–H Amination of 2-Aminoacetophenones: a Convenient Route toward Isatins**

*Pang-Chi Huang, Parthasarathy Gandeepan and Chien-Hong Cheng\**

Department of Chemistry, National Tsing Hua University, Hsinchu 30013, Taiwan

*chcheng@mx.nthu.edu.tw*

## **Supporting Information**

| <b>Table of Contents</b>                                                            | <b>Page No</b> |
|-------------------------------------------------------------------------------------|----------------|
| Experimental Section                                                                | S-2            |
| Details of Optimization Studies                                                     | S-2            |
| General Procedure for Synthesis of Isatins                                          | S-3            |
| <sup>1</sup> H NMR, <sup>13</sup> C NMR, IR and HRMS Data of compounds <b>2a-2t</b> | S-4            |
| References                                                                          | S-9            |
| <sup>1</sup> H and <sup>13</sup> C NMR Spectra                                      | S-10           |

**General.** All reactions were conducted under an oxygen atmosphere on a dual-manifold Schlenk line unless otherwise mentioned and in oven-dried glass wares. All solvents were dried according to known methods and distilled prior to use.<sup>1</sup> 2-Aminoacetophenones **1** were synthesized according to the literature procedures.<sup>2</sup> Other reagents were commercially available and used as purchased.

**Table. Optimization Studies for the Formation of *N*-Methylisatin **2a**.<sup>a</sup>**

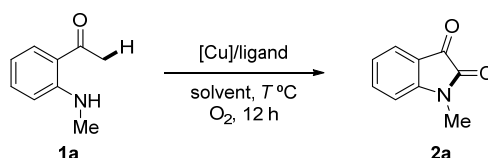

| entry     | [Cu]/L, mol% <sup>b</sup> | Cu source            | ligand     | solvent          | yield % <sup>c</sup>       |
|-----------|---------------------------|----------------------|------------|------------------|----------------------------|
| 1         | 10                        | Cu(OAc) <sub>2</sub> | bpy        | DMSO             | 12                         |
| 2         | 10                        | Cu(OH) <sub>2</sub>  | bpy        | DMSO             | 20                         |
| 3         | 10                        | CuO                  | bpy        | DMSO             | 5                          |
| 4         | 10                        | Cu <sub>2</sub> O    | bpy        | DMSO             | trace                      |
| 5         | 10                        | CuCl                 | bpy        | DMSO             | 3                          |
| 6         | 10                        | CuCl <sub>2</sub>    | bpy        | DMSO             | 10                         |
| 7         | 10                        | CuBr                 | bpy        | DMSO             | 13                         |
|           |                           |                      |            |                  |                            |
| 8         | 10                        | CuI                  | <b>L1</b>  | DMSO             | 70                         |
| 9         | 10                        | CuI                  | <b>L2</b>  | DMSO             | 27                         |
| 10        | 10                        | CuI                  | <b>L3</b>  | DMSO             | 85                         |
| 11        | 10                        | CuI                  | <b>L4</b>  | DMSO             | 86                         |
| 12        | 10                        | CuI                  | dppe       | DMSO             | 69                         |
| 13        | 10                        | CuI                  | TMEDA      | DMSO             | 47                         |
|           |                           |                      |            |                  |                            |
| 14        | 10                        | CuI                  | bpy        | DMF              | 68                         |
| 15        | 5                         | CuI                  | bpy        | DMF              | 22                         |
| 16        | 20                        | CuI                  | bpy        | DMF              | 67                         |
| 17        | 20                        | CuI                  | bpy        | DMF              | 59 <sup>d</sup>            |
| 18        | 10                        | CuI                  | bpy        | DMF              | 31 <sup>e</sup>            |
|           |                           |                      |            |                  |                            |
| 19        | 10                        | CuI                  | bpy        | DMAc             | 65                         |
| 20        | 10                        | CuI                  | bpy        | <i>o</i> -DCB    | 47                         |
| 21        | 10                        | CuI                  | bpy        | <i>o</i> -xylene | 26                         |
| <b>22</b> | <b>10</b>                 | <b>CuI</b>           | <b>bpy</b> | <b>DMSO</b>      | <b>91 (89)<sup>f</sup></b> |
| 23        | –                         | –                    | –          | DMSO             | N.R.                       |

<sup>a</sup> Unless otherwise mentioned, all reactions were carried out using **1a** (0.3 mmol), CuI, ligand in 0.6 mL solvent. <sup>b</sup> The ratio of Cu source and ligand was 1:1. <sup>c</sup> Yields were determined by the <sup>1</sup>H NMR integration method using CH<sub>2</sub>Br<sub>2</sub> as the internal standard. <sup>d</sup> 1.2 mL DMF was used. <sup>e</sup> Reaction was carried out for 120 °C. <sup>f</sup> Isolated yield. bpy = 2,2'-bipyridine. DMAc = *N,N*-dimethylacetamide. *o*-DCB = *o*-dichlorobenzene.

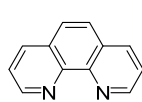

**L1**

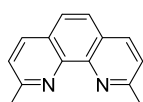

**L3**

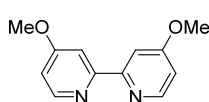

**L2**

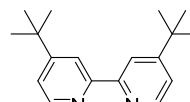

**L4**

**Table. Optimization Studies for the Formation of *N*-Tolyisatin **2m**.<sup>a</sup>**

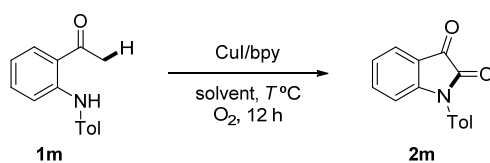

| entry     | CuI/bpy, mol% <sup>b</sup> | solvent                    | yield % <sup>c</sup>         |
|-----------|----------------------------|----------------------------|------------------------------|
| 1         | 10                         | DMF                        | trace                        |
| 2         | 10                         | DMSO                       | trace                        |
| 3         | 10                         | <i>o</i> -xylene           | 74                           |
| 4         | 10                         | Ph-Cl                      | 73                           |
| 5         | 10                         | <i>o</i> -DCB              | 75                           |
| 6         | 10                         | 2-ethoxyethanol            | complicated                  |
| 7         | 10                         | AcOH                       | complicated                  |
| 8         | 10                         | <i>o</i> -DCB              | 66 <sup>d</sup>              |
| 9         | 10                         | <i>o</i> -DCB <sup>e</sup> | 66                           |
| 10        | 5                          | <i>o</i> -DCB              | 72                           |
| <b>11</b> | <b>10</b>                  | <b><i>o</i>-DCB</b>        | <b>77 (72)<sup>f,g</sup></b> |
| 12        | –                          | <i>o</i> -DCB              | N.R.                         |

<sup>a</sup> Unless otherwise mentioned, all reactions were carried out using **1m** (0.3 mmol) in 0.6 mL solvent. <sup>b</sup> The ratio of Cu source and ligand was 1:1. <sup>c</sup> Yields were determined by the <sup>1</sup>H NMR integration method using CH<sub>2</sub>Br<sub>2</sub> as the internal standard. <sup>d</sup> Reaction was carried out for 120 °C, 24 h. <sup>e</sup> 1.2 mL *o*-DCB was used. <sup>f</sup> Reaction was carried out for 3 h. <sup>g</sup> Isolated yield.

### General Procedure for the Copper-Catalyzed Synthesis of Isatines:

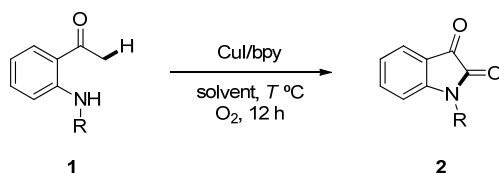

A sealed tube containing CuI (0.030 mmol, 10.0 mol%), 2,2'-bipyridine (10.0 mol%) was evacuated and purged with oxygen gas three times. Then, DMSO or *o*-DCB (0.6 mL), 2-aminoacetophenone **1** (0.30 mmol), were sequentially added to the system via a syringe under an oxygen atmosphere and the reaction mixture was allowed to stir at 140 °C for 3-12 h. When the reaction was completed, the mixture was cooled and diluted with CH<sub>2</sub>Cl<sub>2</sub> (10 mL). The mixture was filtered through a Celite and silica gel pads and washed with EA (50 mL). The combined filtrate was concentrated and the residue was purified by a silica gel column using hexane–EtOAc as eluent to give pure **2a** in 89%.

### 1-Methylindoline-2,3-dione (2a)

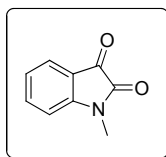

red solid; **m.p.** 121 – 122 °C; **<sup>1</sup>H NMR** (400 MHz, CDCl<sub>3</sub>): δ 7.64 – 7.59 (m, 2H), 7.14 (td, *J* = 7.4, 0.8 Hz, 1H), 6.91 (d, *J* = 8.0 Hz, 1H), 3.26 (s, 3H); **<sup>13</sup>C NMR** (100 MHz, CDCl<sub>3</sub>): δ 183.2, 158.0, 151.2, 138.3, 124.9, 123.6, 117.1, 109.9, 26.0; **IR** (neat, cm<sup>-1</sup>): 1728, 1606, 1469, 1327, 1112, 1089; **HRMS** (EI<sup>+</sup>) calcd for C<sub>9</sub>H<sub>7</sub>NO<sub>2</sub>: 161.0477, found: 161.0474.

### 1-Propylindoline-2,3-dione (2b)

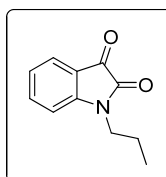

red solid; **m.p.** 66 – 68 °C; **<sup>1</sup>H NMR** (400 MHz, CDCl<sub>3</sub>): δ 7.61 – 7.57 (m, 2H), 7.11 (t, *J* = 7.4 Hz, 1H), 6.91 (d, *J* = 8.0 Hz, 1H), 3.70 (t, *J* = 7.2 Hz, 2H), 1.75 (sextet, *J* = 7.4 Hz, 2H), 1.00 (t, *J* = 7.4 Hz, 3H); **<sup>13</sup>C NMR** (100 MHz, CDCl<sub>3</sub>): δ 183.5, 158.1, 150.9, 138.3, 125.2, 123.5, 117.4, 110.1, 41.6, 20.5, 11.2; **IR** (neat, cm<sup>-1</sup>): 2962, 1728, 1614, 1471, 1342, 1128, 1093; **HRMS** (EI<sup>+</sup>) calcd for C<sub>11</sub>H<sub>11</sub>NO<sub>2</sub>: 189.0790, found: 189.0785.

### 1-(2-Methoxyethyl)indoline-2,3-dione (2c)

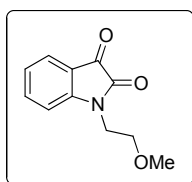

red solid; **m.p.** 75 – 76 °C; **<sup>1</sup>H NMR** (400 MHz, CDCl<sub>3</sub>): δ 7.60 – 7.56 (m, 2H), 7.10 (td, *J* = 8.0, 0.8 Hz, 1H), 7.05 (dd, *J* = 8.4, 0.8 Hz, 1H), 3.91 (t, *J* = 5.4 Hz, 2H), 3.66 (t, *J* = 5.4 Hz, 2H), 3.34 (s, 3H); **<sup>13</sup>C NMR** (100 MHz, CDCl<sub>3</sub>): δ 183.3, 158.3, 151.4, 138.2, 125.0, 123.5, 117.4, 111.0, 69.8, 58.9, 40.3; **IR** (neat, cm<sup>-1</sup>): 2929, 2894, 2832, 1743, 1614, 1471, 1344, 1118, 1093; **HRMS** (EI<sup>+</sup>) calcd for C<sub>11</sub>H<sub>11</sub>NO<sub>3</sub>: 205.0739, found: 205.0738.

### 5-Methyl-1-propylindoline-2,3-dione (2d)

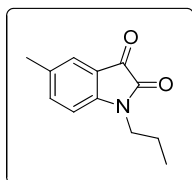

red solid; **m.p.** 78 – 79 °C; **<sup>1</sup>H NMR** (400 MHz, CDCl<sub>3</sub>): δ 7.41 – 7.37 (m, 2H), 6.79 (d, *J* = 8.0 Hz, 1H), 3.67 (t, *J* = 7.2 Hz, 2H), 2.33 (s, 3H), 1.73 (sextet, *J* = 7.4 Hz, 2H), 0.99 (t, *J* = 7.4 Hz, 3H); **<sup>13</sup>C NMR** (100 MHz, CDCl<sub>3</sub>): δ 183.8, 158.2, 148.8, 138.6, 133.3, 125.6, 117.4, 110.0, 41.7, 20.53, 20.50, 11.2; **IR** (neat, cm<sup>-1</sup>): 2966, 2875, 1730, 1619, 1492, 1344, 1207, 1122; **HRMS** (EI<sup>+</sup>) calcd for C<sub>12</sub>H<sub>13</sub>NO<sub>2</sub>: 203.0946, found: 203.0949.

#### 4,6-Dimethyl-1-propylindoline-2,3-dione (2e)

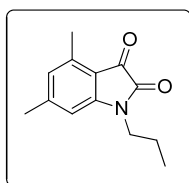

red solid; **m.p.** 110 – 112 °C;  $^1\text{H NMR}$  (400 MHz,  $\text{CDCl}_3$ ):  $\delta$  6.68 (d,  $J = 0.8$  Hz, 1H), 6.50 (s, 1H), 3.65 (t,  $J = 7.2$  Hz, 2H), 2.52 (s, 3H), 2.38 (s, 3H), 1.72 (sextet,  $J = 7.4$  Hz, 2H), 0.99 (t,  $J = 7.4$  Hz, 3H);  $^{13}\text{C NMR}$  (100 MHz,  $\text{CDCl}_3$ ):  $\delta$  183.2, 158.7, 151.3, 149.6, 141.0, 126.3, 113.5, 108.2, 41.4, 22.6, 20.6, 17.8, 11.2; **IR** (neat,  $\text{cm}^{-1}$ ): 3056, 2962, 2875, 1731, 1616, 1596, 1456, 1261, 1149; **HRMS** ( $\text{EI}^+$ ) calcd for  $\text{C}_{13}\text{H}_{15}\text{NO}_2$ : 217.1103, found: 217.1100.

#### 5-Bromo-1-propylindoline-2,3-dione (2f)

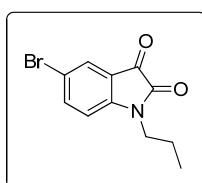

red solid; **m.p.** 124 – 125 °C;  $^1\text{H NMR}$  (400 MHz,  $\text{CDCl}_3$ ):  $\delta$  7.71 – 7.68 (m, 2H), 6.82 (dd,  $J = 8.0, 0.8$  Hz, 1H), 3.69 (t,  $J = 7.4$  Hz, 2H), 1.73 (sextet,  $J = 7.4$  Hz, 2H), 0.99 (t,  $J = 7.4$  Hz, 3H);  $^{13}\text{C NMR}$  (100 MHz,  $\text{CDCl}_3$ ):  $\delta$  182.3, 157.3, 149.7, 140.4, 127.9, 118.5, 116.2, 111.9, 41.8, 20.4, 11.2; **IR** (neat,  $\text{cm}^{-1}$ ): 3079, 2971, 2873, 1736, 1606, 1465, 1432, 1330, 1178, 1116; **HRMS** ( $\text{EI}^+$ ) calcd for  $\text{C}_{11}\text{H}_{10}\text{BrNO}_2$ : 266.9895, found: 266.9873.

#### 5-Propyl-5H-[1,3]dioxolo[4,5-f]indole-6,7-dione (2g)

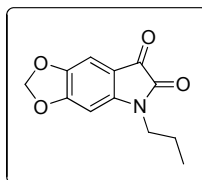

dark red solid; **m.p.** 130 – 131 °C;  $^1\text{H NMR}$  (400 MHz,  $\text{CDCl}_3$ ):  $\delta$  7.03 (s, 1H), 6.43 (s, 1H), 6.06 (s, 2H), 3.62 (t,  $J = 7.4$  Hz, 2H), 1.70 (sextet,  $J = 7.4$  Hz, 2H), 0.98 (t,  $J = 7.4$  Hz, 3H);  $^{13}\text{C NMR}$  (100 MHz,  $\text{CDCl}_3$ ):  $\delta$  180.9, 159.1, 156.5, 150.7, 144.2, 110.2, 104.8, 102.6, 93.2, 41.7, 20.7, 11.2; **IR** (neat,  $\text{cm}^{-1}$ ): 2925, 1720, 1610, 1475, 1245, 1118, 1031; **HRMS** ( $\text{EI}^+$ ) calcd for  $\text{C}_{12}\text{H}_{11}\text{NO}_4$ : 233.0688, found: 233.0686.

#### 1-Benzylindoline-2,3-dione (2h)

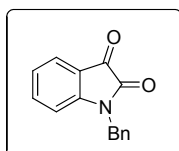

red solid; **m.p.** 122 – 123 °C;  $^1\text{H NMR}$  (400 MHz,  $\text{CDCl}_3$ ):  $\delta$  7.61 (dd,  $J = 7.2, 0.8$  Hz, 1H), 7.48 (td,  $J = 8.0, 1.2$  Hz, 2H), 7.36 – 7.30 (m, 4H), 7.09 (t,  $J = 7.6$  Hz, 1H), 6.78 (d,  $J = 7.6$  Hz, 1H), 4.94 (s, 2H);  $^{13}\text{C NMR}$  (100 MHz,  $\text{CDCl}_3$ ):  $\delta$  183.1, 158.2, 150.6, 138.3, 134.4, 128.9, 128.0, 127.3, 125.2, 123.7, 117.5, 110.9, 43.9; **IR** (neat,  $\text{cm}^{-1}$ ): 3454, 3029, 1731, 1612, 1471, 1349, 1176, 1002; **HRMS** ( $\text{EI}^+$ ) calcd for  $\text{C}_{15}\text{H}_{11}\text{NO}_2$ : 237.0790, found: 237.0789.

### 1-Phenylindoline-2,3-dione (2l)

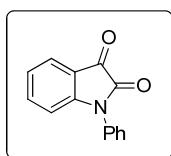

red solid; **m.p.** 128 – 129 °C; **<sup>1</sup>H NMR** (400 MHz, CDCl<sub>3</sub>): δ 7.70 (dd,  $J = 7.2, 0.8$  Hz, 1H), 7.58 – 7.52 (m, 3H), 7.47 (d,  $J = 6.8$  Hz, 1H), 7.42 (d,  $J = 7.2$  Hz, 2H), 7.18 (t,  $J = 7.6$  Hz, 1H), 6.90 (d,  $J = 7.6$  Hz, 1H); **<sup>13</sup>C NMR** (100 MHz, CDCl<sub>3</sub>): δ 182.8, 157.2, 151.5, 138.3, 132.8, 129.9, 128.7, 125.9, 125.5, 124.2, 117.4, 111.2; **IR** (neat, cm<sup>-1</sup>): 3060, 1739, 1608, 1498, 1465, 1365, 1301, 1193, 929; **HRMS** (EI<sup>+</sup>) calcd for C<sub>14</sub>H<sub>9</sub>NO<sub>2</sub>: 223.0633, found: 223.0625.

### 1-(*p*-Tolyl)indoline-2,3-dione (2m)

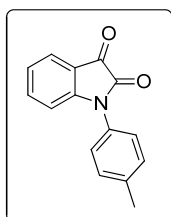

red solid; **m.p.** 131 – 132 °C; **<sup>1</sup>H NMR** (400 MHz, CDCl<sub>3</sub>): δ 7.68 (d,  $J = 7.6$  Hz, 1H), 7.53 (t,  $J = 7.8$  Hz, 1H), 7.36 (d,  $J = 8.4$  Hz, 2H), 7.31 (d,  $J = 8.0$  Hz, 2H), 7.16 (t,  $J = 7.4$  Hz, 1H), 6.87 (d,  $J = 7.6$  Hz, 1H), 2.43 (s, 3H); **<sup>13</sup>C NMR** (100 MHz, CDCl<sub>3</sub>): δ 183.0, 157.4, 151.8, 138.9, 138.3, 130.5, 130.1, 125.7, 125.4, 124.1, 117.3, 111.2, 21.2; **IR** (neat, cm<sup>-1</sup>): 2919, 1737, 1612, 1515, 1465, 1365, 1299, 1180, 1093, 927; **HRMS** (EI<sup>+</sup>) calcd for C<sub>15</sub>H<sub>11</sub>NO<sub>2</sub>: 237.0790, found: 237.0789.

### 1-(4-Fluorophenyl)indoline-2,3-dione (2n)

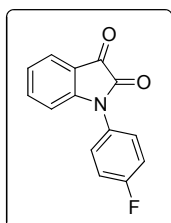

red solid; **m.p.** 222 – 224 °C; **<sup>1</sup>H NMR** (400 MHz, CDCl<sub>3</sub>): δ 7.71 (d,  $J = 7.2$  Hz, 1H), 7.55 (t,  $J = 7.8$  Hz, 1H), 7.43 – 7.39 (m, 2H), 7.28 – 7.23 (m, 2H), 7.19 (t,  $J = 7.6$  Hz, 1H), 7.85 (d,  $J = 8.4$  Hz, 1H); **<sup>13</sup>C NMR** (100 MHz, DMSO-*d*<sub>6</sub>): δ 182.7, 161.4 (d,  $J = 243.9$  Hz), 157.6, 151.2, 138.0, 129.6, 129.0 (d,  $J = 9.3$  Hz), 124.7, 123.7, 117.6, 116.7 (d,  $J = 22.5$  Hz), 110.7; **IR** (neat, cm<sup>-1</sup>): 1735, 1606, 1508, 1461, 1361, 1288, 1182, 1097; **HRMS** (EI<sup>+</sup>) calcd for C<sub>14</sub>H<sub>8</sub>FNO<sub>2</sub>: 241.0539, found: 241.0537.

### 1-(4-Bromophenyl)indoline-2,3-dione (2o)

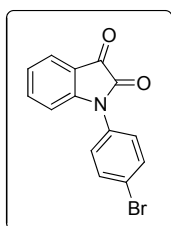

red solid; **m.p.** 169 – 170 °C; **<sup>1</sup>H NMR** (400 MHz, CDCl<sub>3</sub>): δ 7.72 – 7.68 (m, 3H), 7.56 (t,  $J = 7.8$  Hz, 1H), 7.32 (d,  $J = 8.0$  Hz, 2H), 7.20 (t,  $J = 7.6$  Hz, 1H), 6.90 (d,  $J = 8.4$  Hz, 1H); **<sup>13</sup>C NMR** (100 MHz, CDCl<sub>3</sub>): δ 182.3, 157.1, 151.0, 138.4, 133.1, 131.8, 127.5, 125.7, 124.5, 122.4, 117.5, 110.7; **IR** (neat, cm<sup>-1</sup>): 1737, 1610, 1494, 1465,

1363, 1294, 1180, 1012, 925; **HRMS** ( $\text{EI}^+$ ) calcd for  $\text{C}_{14}\text{H}_8\text{BrNO}_2$ : 300.9738, found: 300.9743.

#### 1-(4-(Trifluoromethyl)phenyl)indoline-2,3-dione (2p)

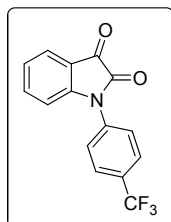

red solid; **m.p.** 171 – 173 °C;  $^1\text{H NMR}$  (400 MHz,  $\text{CDCl}_3$ ):  $\delta$  7.83 (d,  $J = 8.0$  Hz, 2H), 7.74 (dd,  $J = 7.2, 0.8$  Hz, 1H), 7.62 – 7.57 (m, 3H), 7.23 (t,  $J = 7.6$  Hz, 1H), 6.97 (d,  $J = 8.0$  Hz, 1H);  $^{13}\text{C NMR}$  (100 MHz,  $\text{CDCl}_3$ ):  $\delta$  182.0, 157.0, 150.6, 138.4, 136.1, 130.5 (q,  $J = 32.8$  Hz), 127.0 (q,  $J = 3.6$  Hz), 126.0, 125.8, 124.7, 123.5 (q,  $J = 270.8$  Hz), 117.5, 111.1; **IR** (neat,  $\text{cm}^{-1}$ ): 3095, 1743, 1606, 1469, 1373, 1317, 1160, 1114, 925; **HRMS** ( $\text{EI}^+$ ) calcd for  $\text{C}_{15}\text{H}_8\text{F}_3\text{NO}_2$ : 291.0507, found: 291.0502.

#### 1-(4-Methoxyphenyl)indoline-2,3-dione (2q)

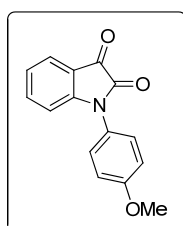

red solid; **m.p.** 155 – 156 °C;  $^1\text{H NMR}$  (400 MHz,  $\text{CDCl}_3$ ):  $\delta$  7.68 (d,  $J = 7.6$  Hz, 1H), 7.53 (t,  $J = 7.6$  Hz, 1H), 7.32 (d,  $J = 8.8$  Hz, 2H), 7.15 (t,  $J = 7.6$  Hz, 1H), 7.06 (d,  $J = 8.4$  Hz, 2H), 6.83 (d,  $J = 7.6$  Hz, 1H), 3.87 (s, 3H);  $^{13}\text{C NMR}$  (100 MHz,  $\text{CDCl}_3$ ):  $\delta$  183.1, 159.6, 157.6, 152.0, 138.3, 127.4, 125.4, 125.3, 124.1, 117.4, 115.2, 111.1, 55.5; **IR** (neat,  $\text{cm}^{-1}$ ): 2917, 2840, 1731, 1608, 1513, 1465, 1297, 1251, 1184, 1027; **HRMS** ( $\text{EI}^+$ ) calcd for  $\text{C}_{15}\text{H}_{11}\text{NO}_3$ : 253.0739, found: 253.0736.

#### 4,6-Dimethyl-1-(*p*-tolyl)indoline-2,3-dione (2r)

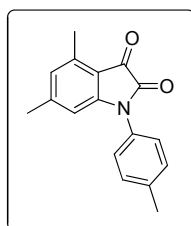

red solid; **m.p.** 156 – 157 °C;  $^1\text{H NMR}$  (400 MHz,  $\text{CDCl}_3$ ):  $\delta$  7.35 (d,  $J = 8.8$  Hz, 2H), 7.27 – 7.25 (m, 2H), 6.72 (s, 1H), 6.44 (s, 1H), 2.58 (s, 3H), 2.43 (s, 3H), 2.30 (s, 3H);  $^{13}\text{C NMR}$  (100 MHz,  $\text{CDCl}_3$ ):  $\delta$  182.6, 158.1, 152.3, 149.7, 141.3, 138.7, 130.43, 130.39, 126.9, 126.1, 113.6, 109.3, 22.7, 21.2, 18.1; **IR** (neat,  $\text{cm}^{-1}$ ): 2921, 2852, 1747, 1731, 1614, 1513, 1363, 1276, 1164, 941; **HRMS** ( $\text{EI}^+$ ) calcd for  $\text{C}_{17}\text{H}_{15}\text{NO}_2$ : 265.1103, found: 265.1106.

### 5-(*p*-Tolyl)-5*H*-[1,3]dioxolo[4,5-*f*]indole-6,7-dione (2s)

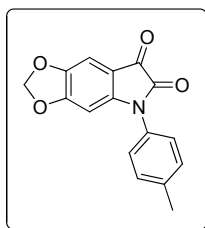

dark red solid; **m.p.** 180 – 182 °C; **<sup>1</sup>H NMR** (400 MHz, CDCl<sub>3</sub>): δ 7.34 (d, *J* = 8.0 Hz, 2H), 7.26 – 7.23 (m, 2H), 7.09 (s, 1H), 6.37 (s, 1H), 6.05 (s, 2H), 2.42 (s, 3H); **<sup>13</sup>C NMR** (100 MHz, CDCl<sub>3</sub>): δ 180.2, 158.4, 156.4, 151.5, 144.7, 138.8, 130.5, 130.1, 125.9, 110.3, 104.5, 102.6, 94.2, 21.2; **IR** (neat, cm<sup>-1</sup>): 2917, 1737, 1716, 1610, 1469, 1382, 1253, 1232, 1157, 1039, 945; **HRMS** (EI<sup>+</sup>) calcd for C<sub>16</sub>H<sub>11</sub>NO<sub>4</sub>: 281.0688, found: 281.0689.

### 5-Bromo-1-(*p*-tolyl)indoline-2,3-dione (2t)

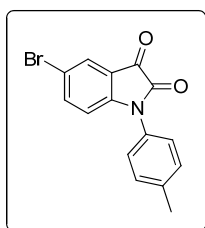

red solid; **m.p.** 192 – 194 °C; **<sup>1</sup>H NMR** (400 MHz, CDCl<sub>3</sub>): δ 7.79 (d, *J* = 2.0 Hz, 1H), 7.63 (dd, *J* = 8.8, 2.0 Hz, 1H), 7.36 (d, *J* = 8.8 Hz, 2H), 7.27 – 7.25 (m, 2H), 6.78 (d, *J* = 8.4 Hz, 1H), 2.43 (s, 3H); **<sup>13</sup>C NMR** (100 MHz, CDCl<sub>3</sub>): δ 181.9, 156.6, 150.6, 140.5, 139.3, 130.7, 129.8, 128.1, 125.7, 118.6, 116.9, 113.0, 21.2; **IR** (neat, cm<sup>-1</sup>): 2923, 1745, 1604, 1467, 1436, 1290, 1189, 1122; **HRMS** (EI<sup>+</sup>) calcd for C<sub>15</sub>H<sub>10</sub>BrNO<sub>2</sub>: 314.9895, found: 314.9890.



### References:

1. Perrin, D. D.; Armarego, W. L. F. *In Purification of Laboratory Chemicals*, 3rd ed.; Pergamon Press: New York, 1988.
2. Sugasawa, T.; Toyoda, T.; Adachi, M.; Sasakura, K. *J. Am. Chem. Soc.* **1978**, *100*, 4842.

<sup>1</sup>H and <sup>13</sup>C NMR spectra of compound 2a

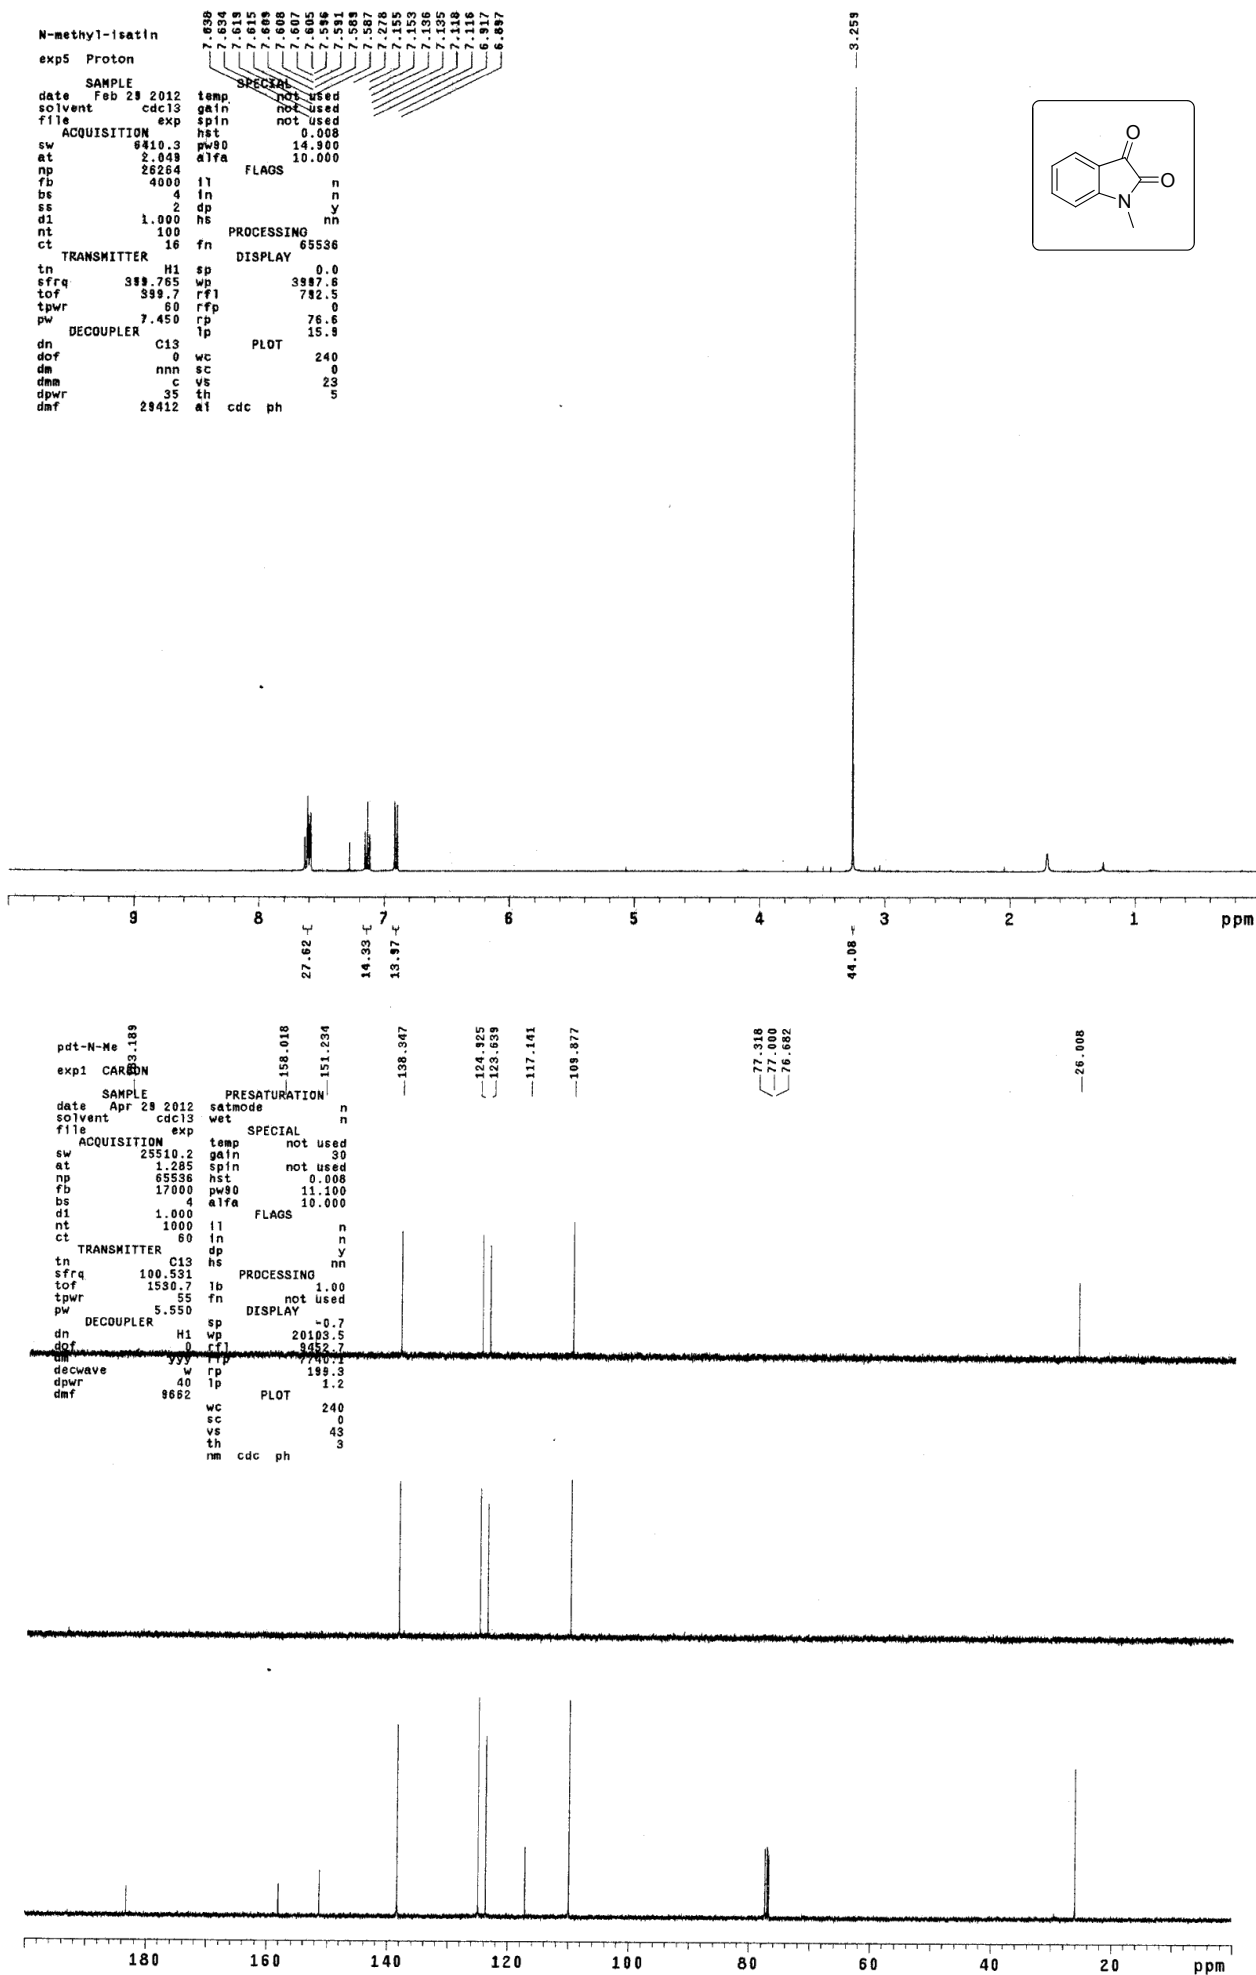

<sup>1</sup>H and <sup>13</sup>C NMR spectra of compound 2b

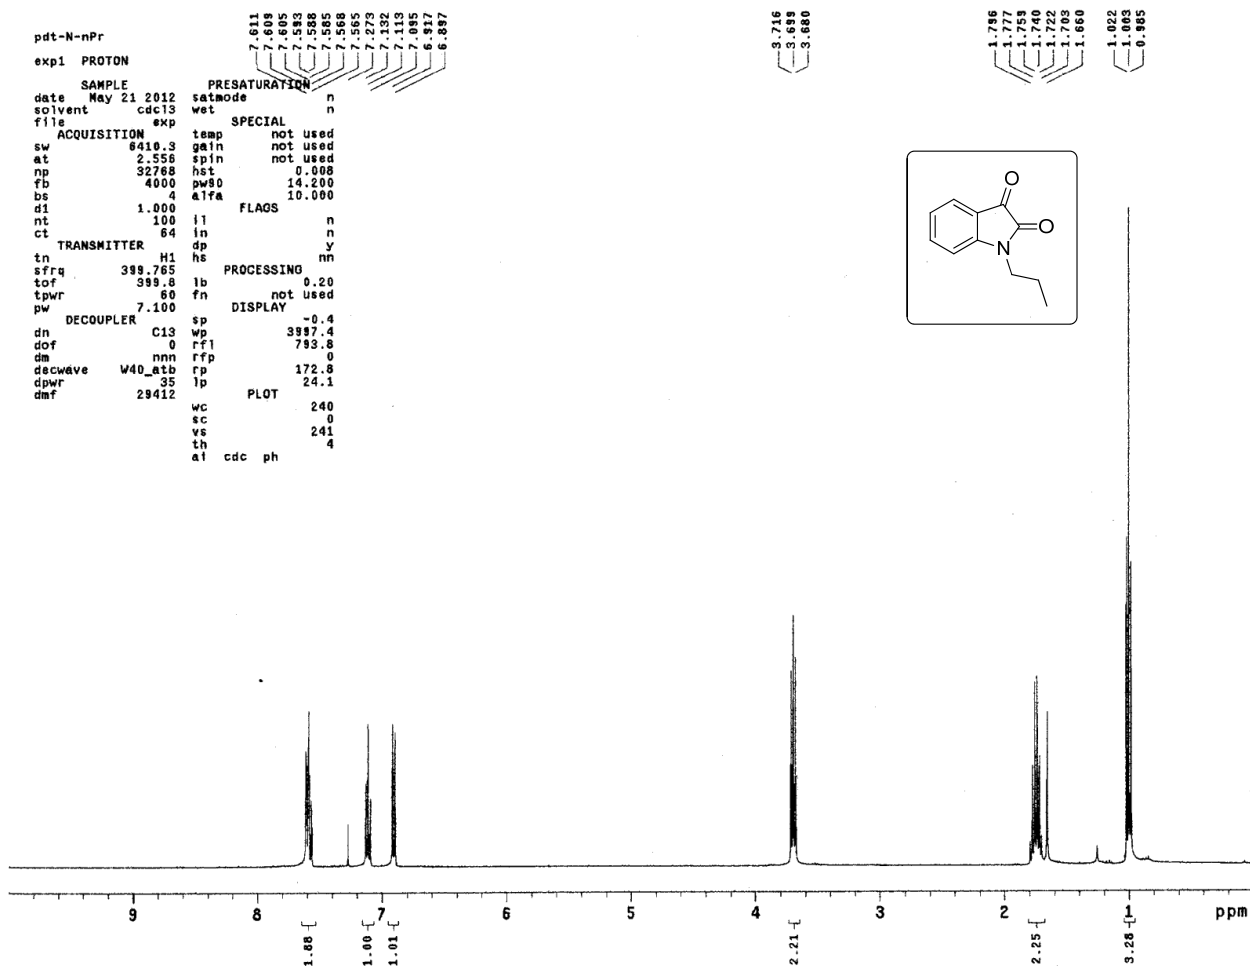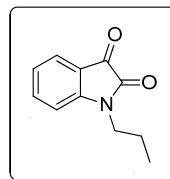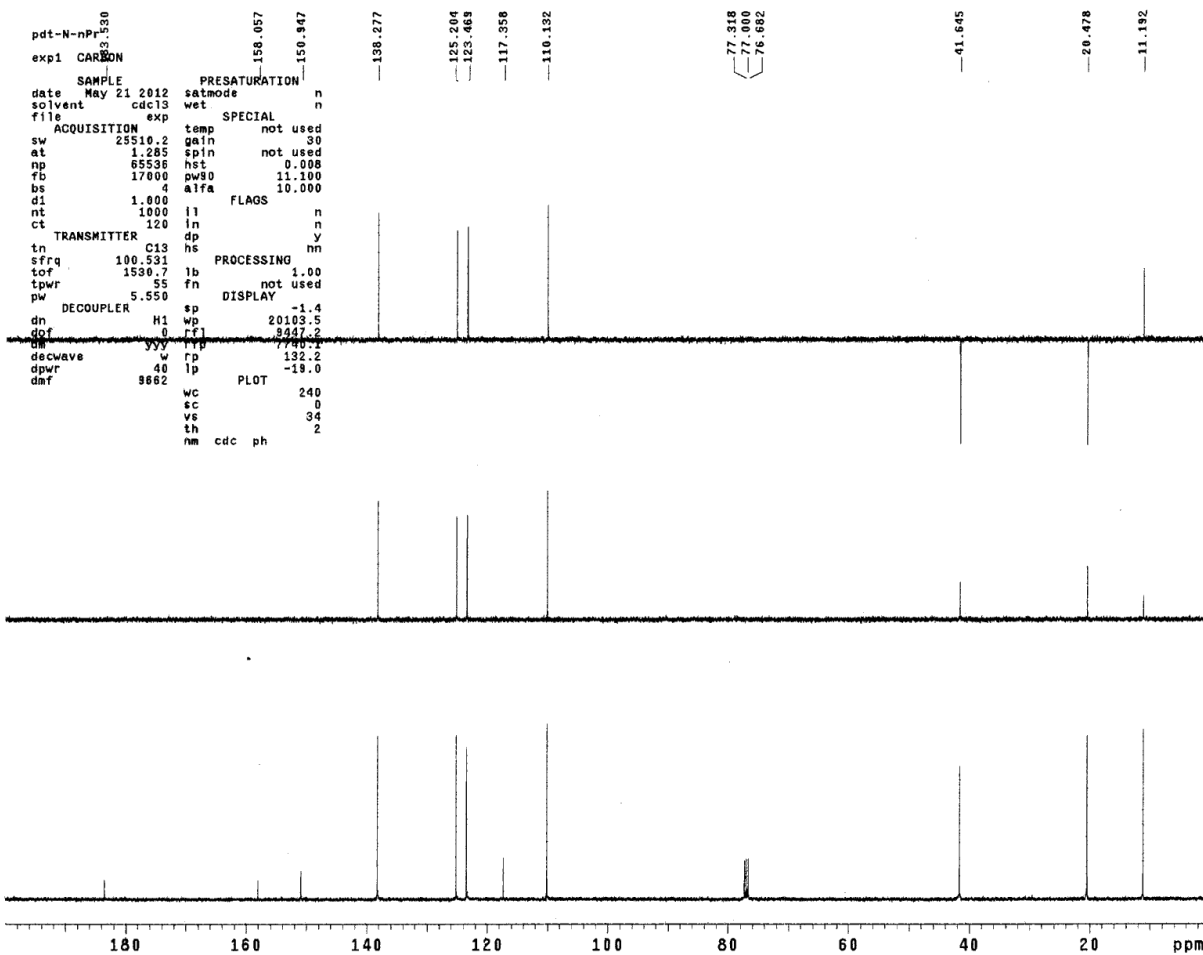

<sup>1</sup>H and <sup>13</sup>C NMR spectra of compound 2c

pdt - N-CH<sub>2</sub>CH<sub>2</sub>OMe

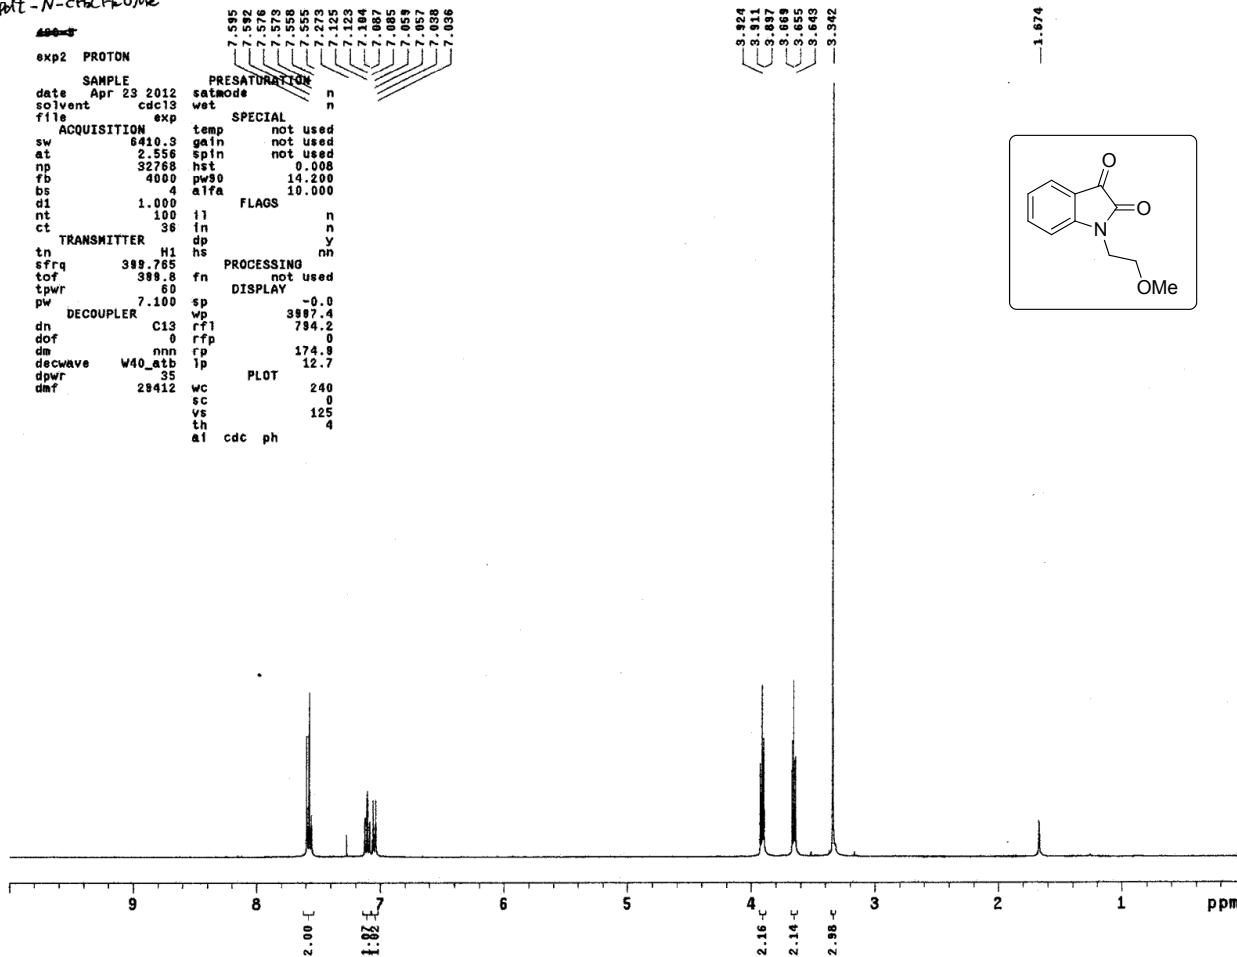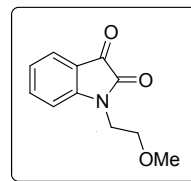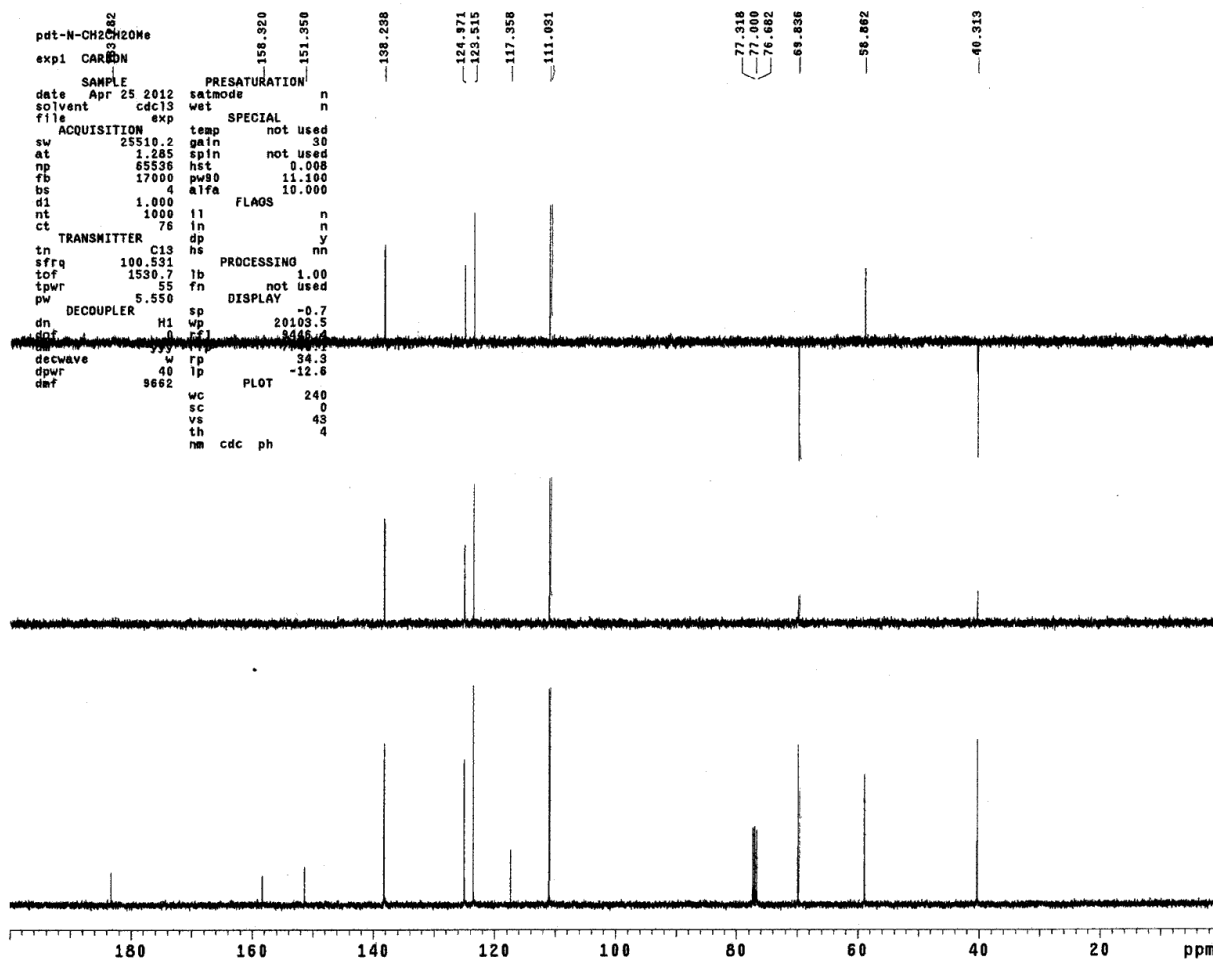

<sup>1</sup>H and <sup>13</sup>C NMR spectra of compound 2d

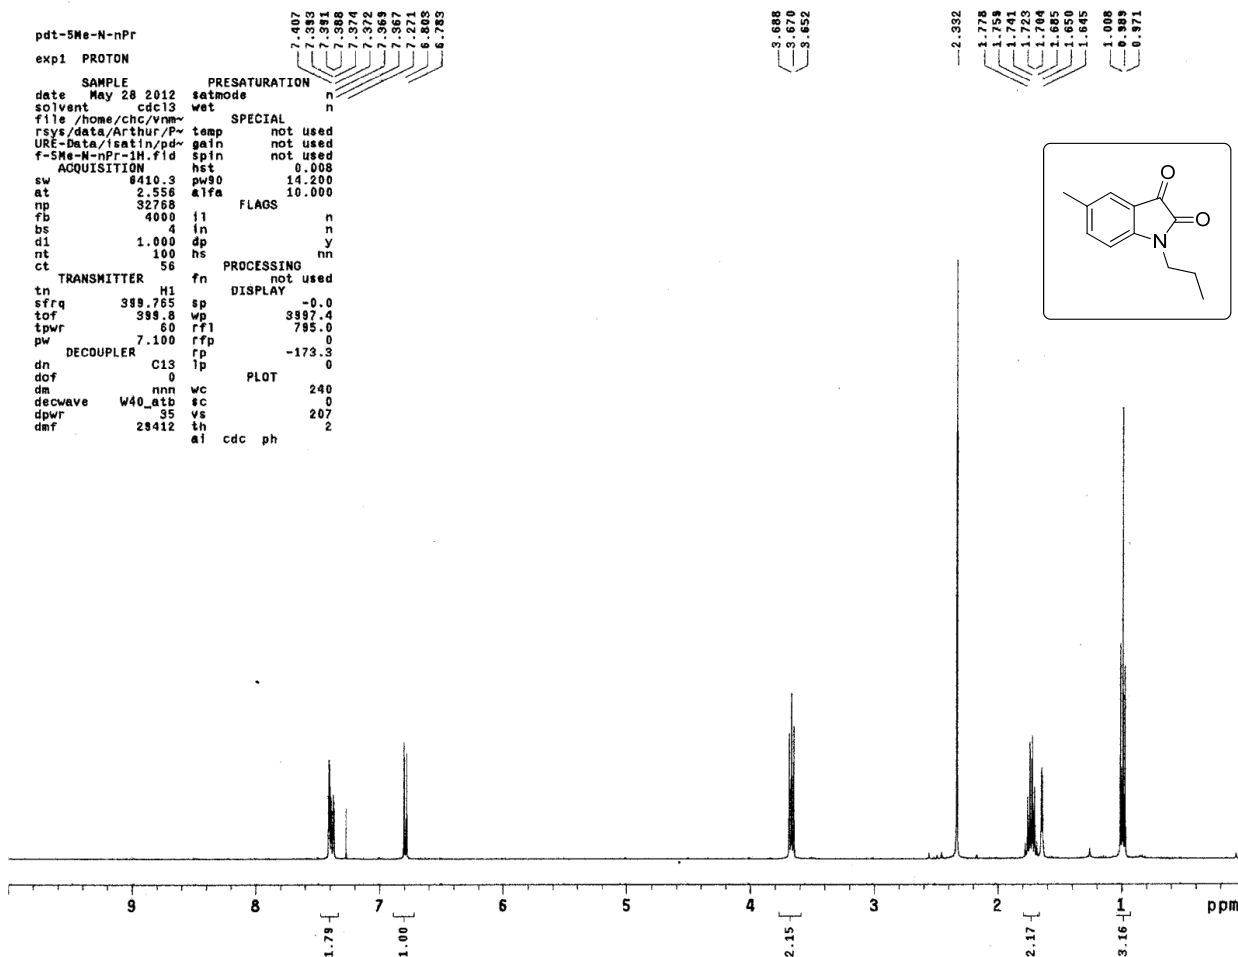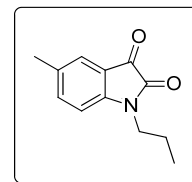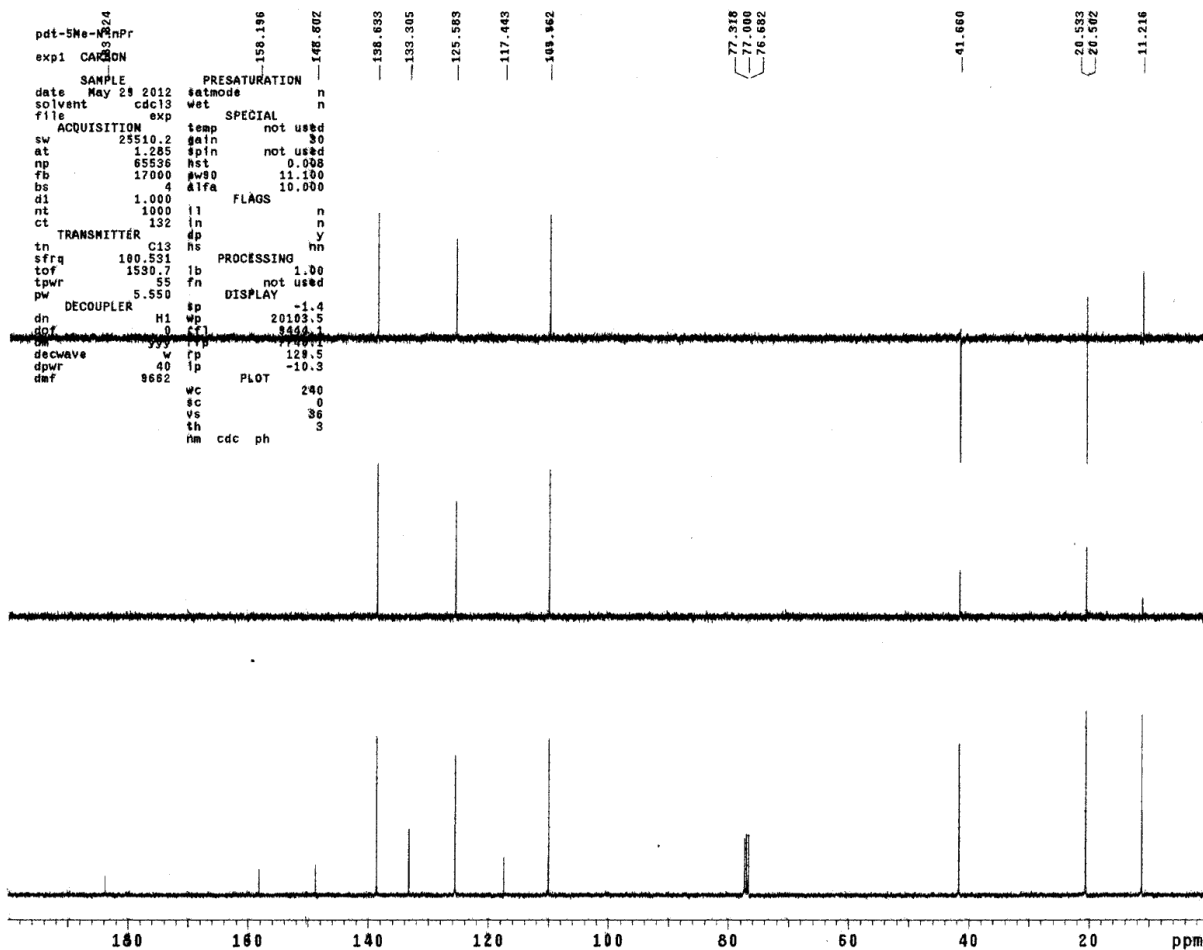

<sup>1</sup>H and <sup>13</sup>C NMR spectra of compound 2e

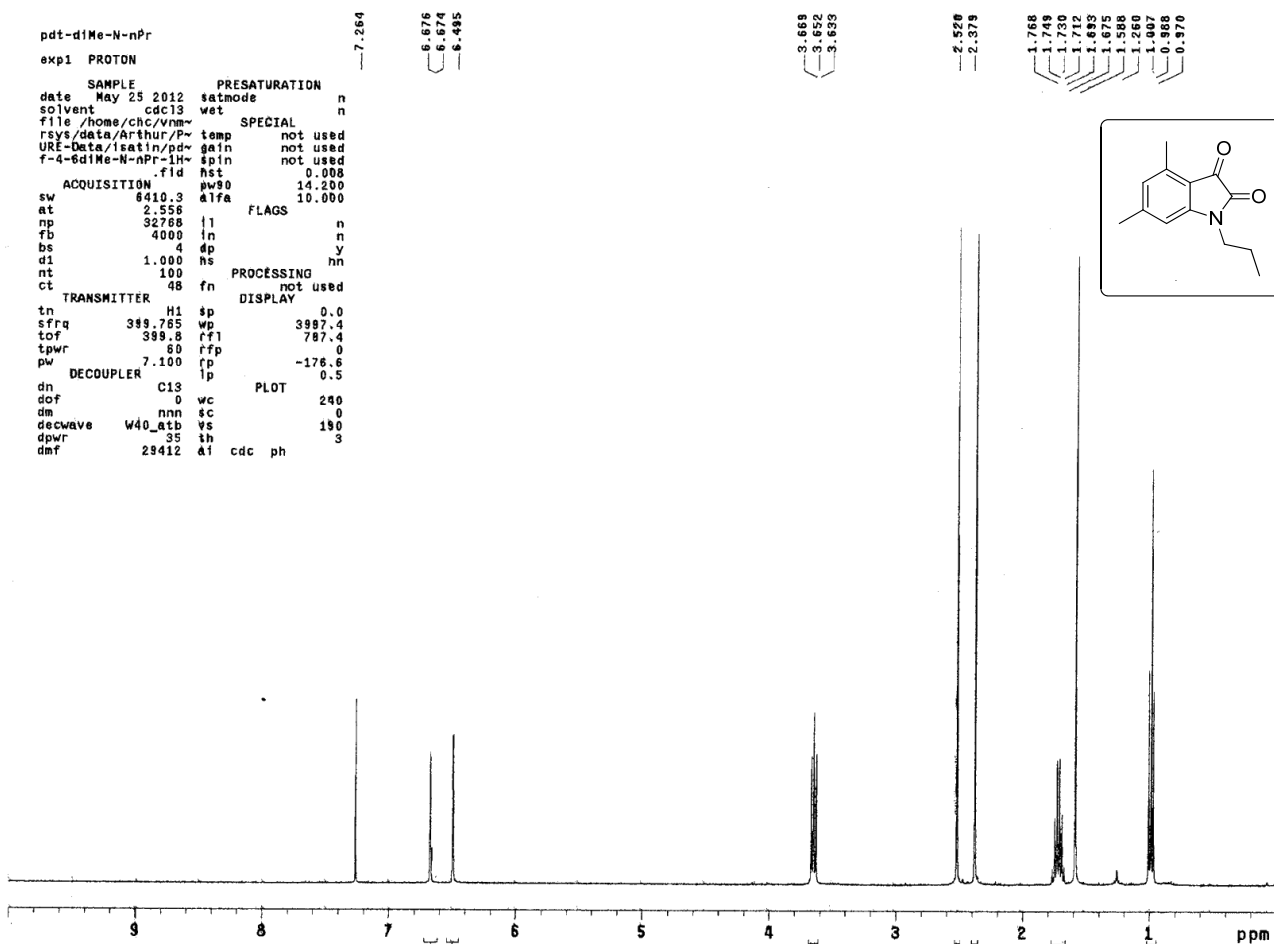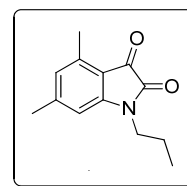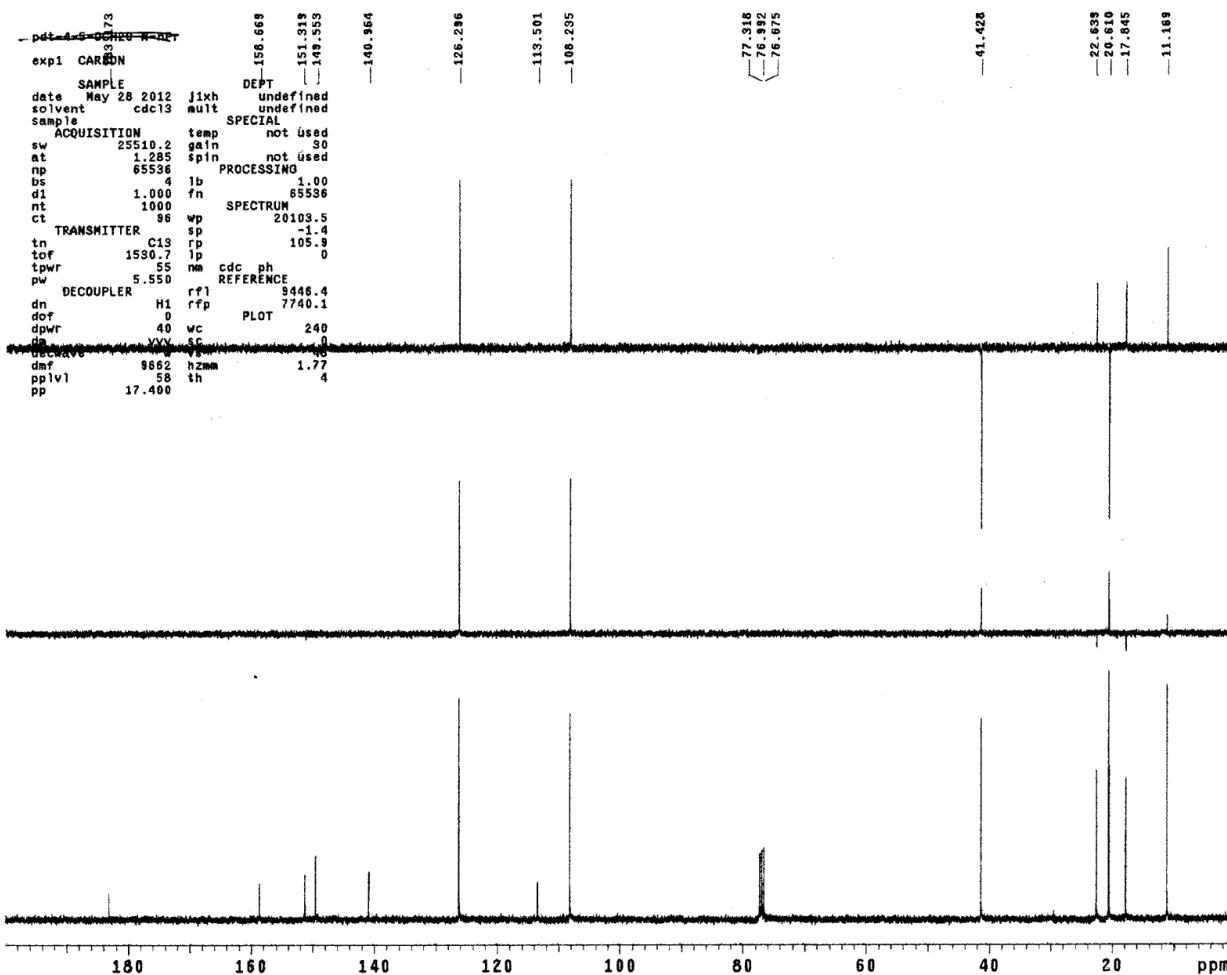

<sup>1</sup>H and <sup>13</sup>C NMR spectra of compound 2f

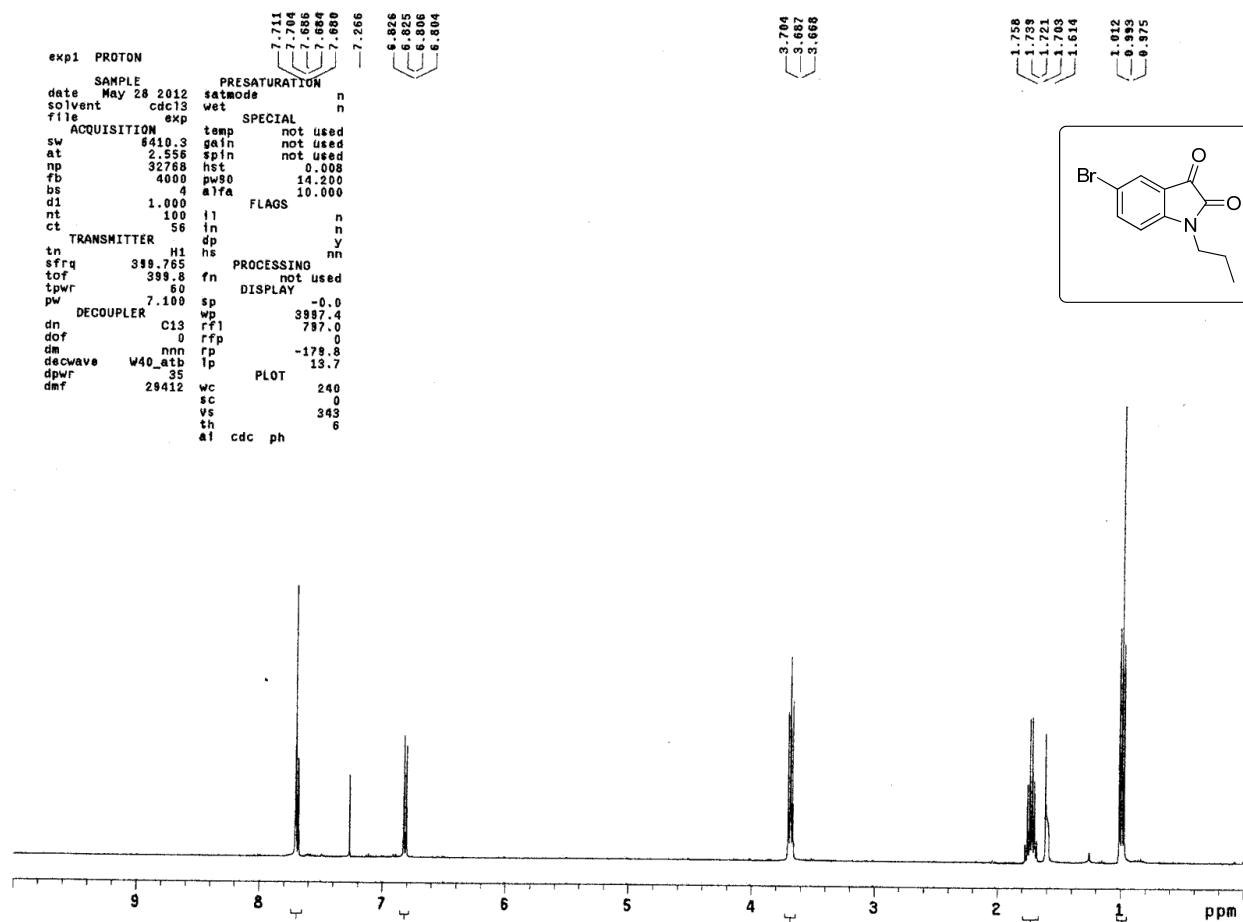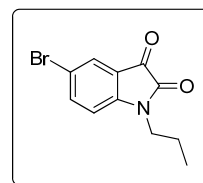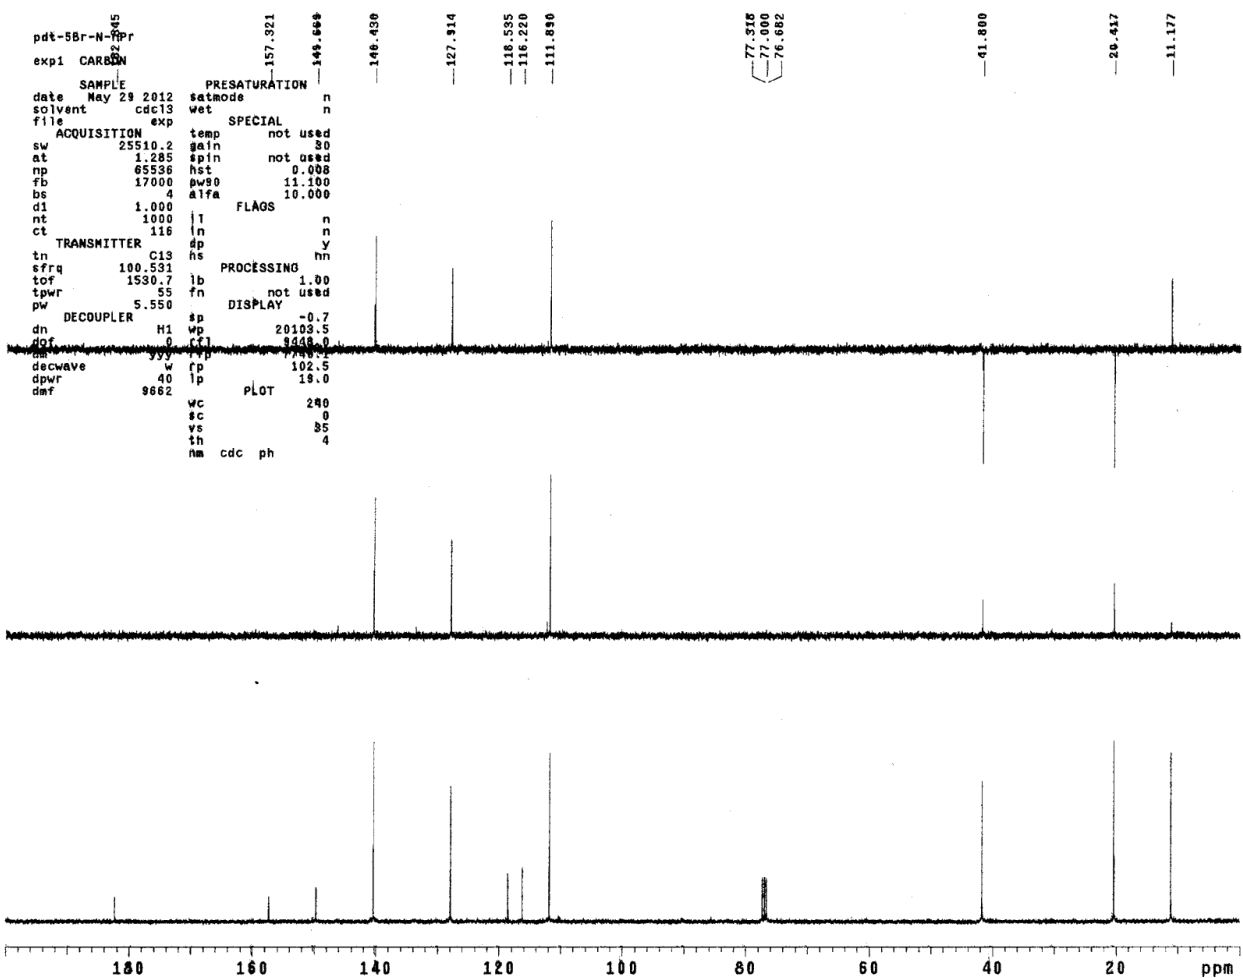

<sup>1</sup>H and <sup>13</sup>C NMR spectra of compound 2g

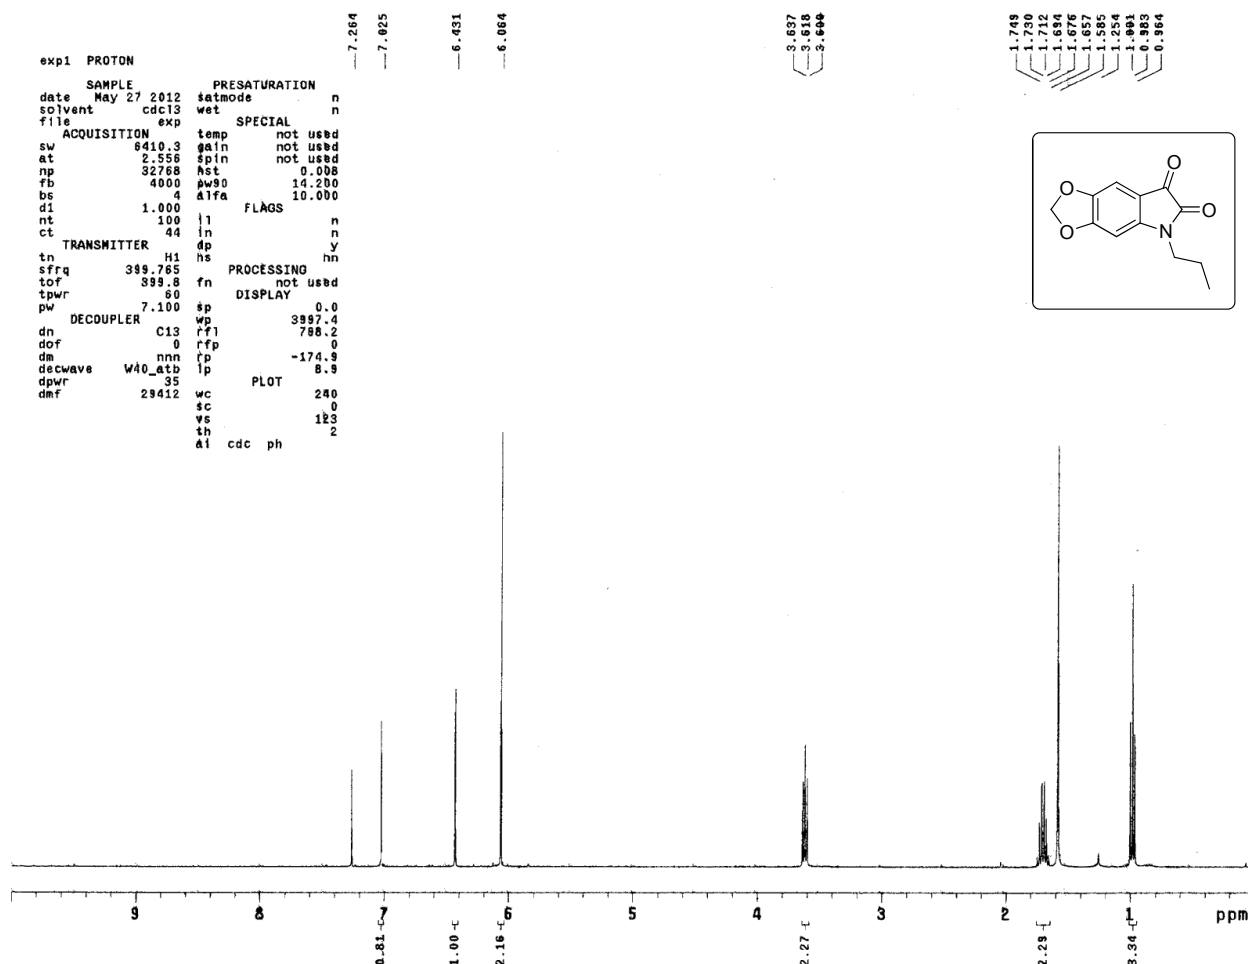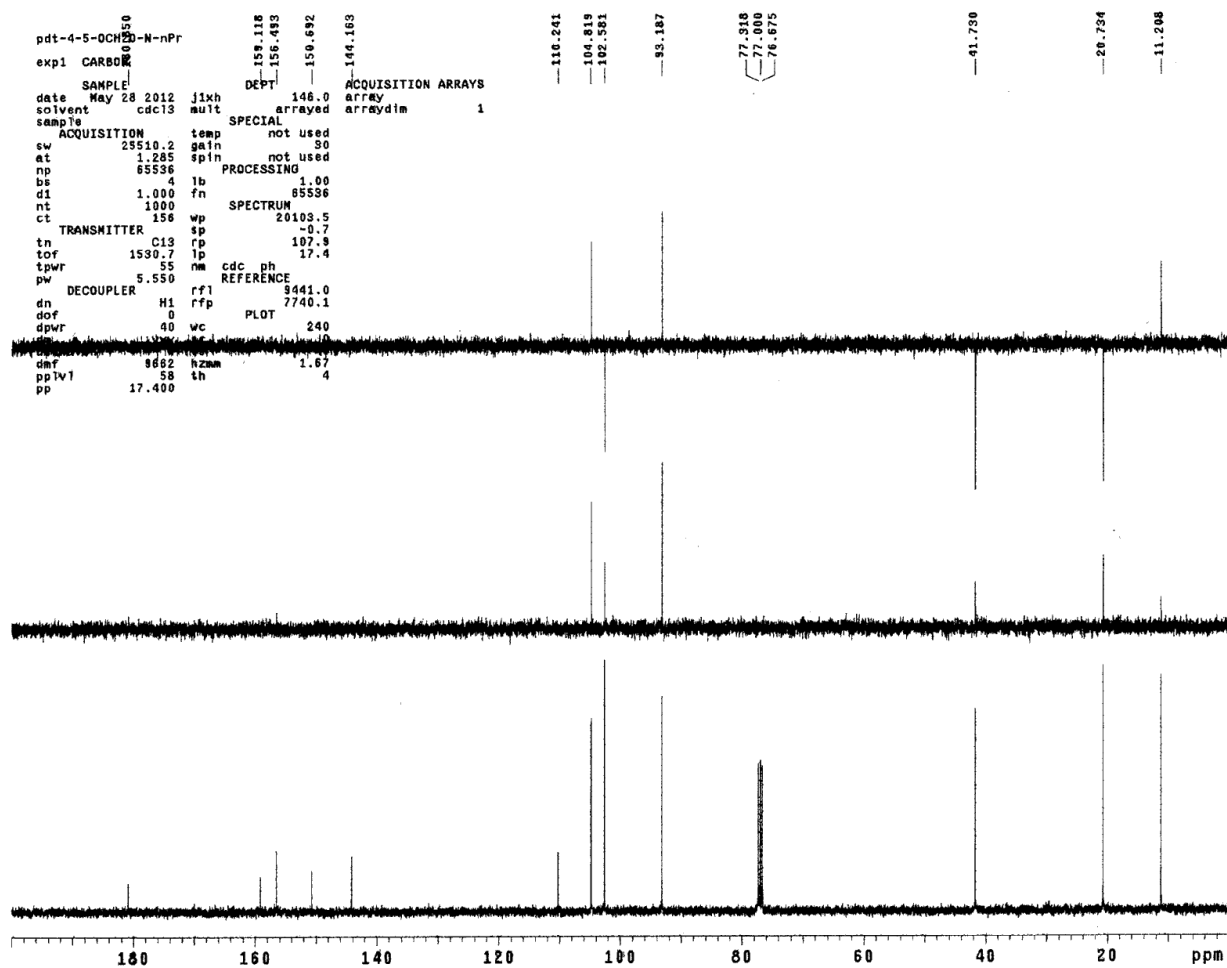



<sup>1</sup>H and <sup>13</sup>C NMR spectra of compound **2h**

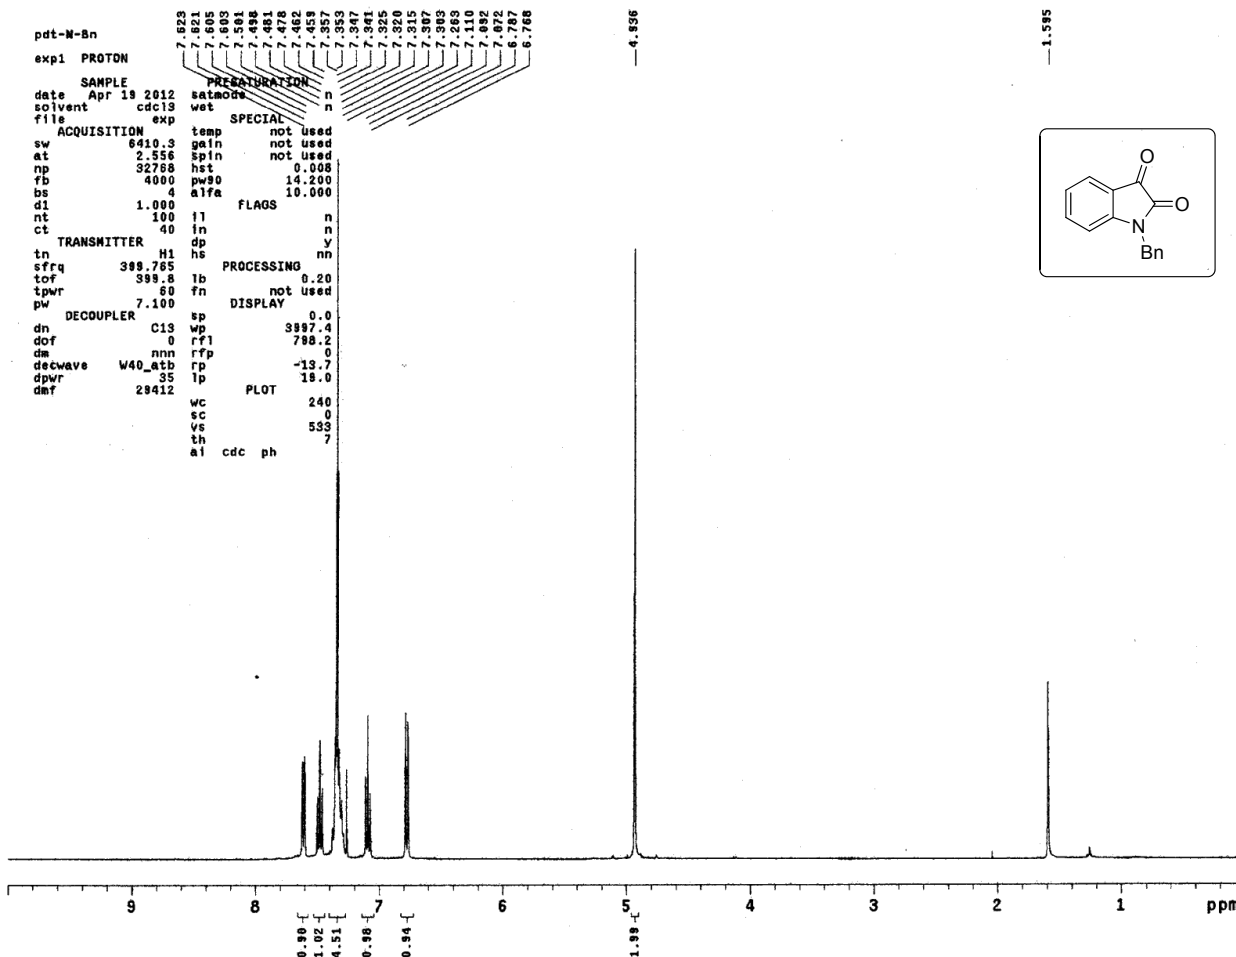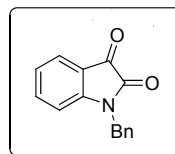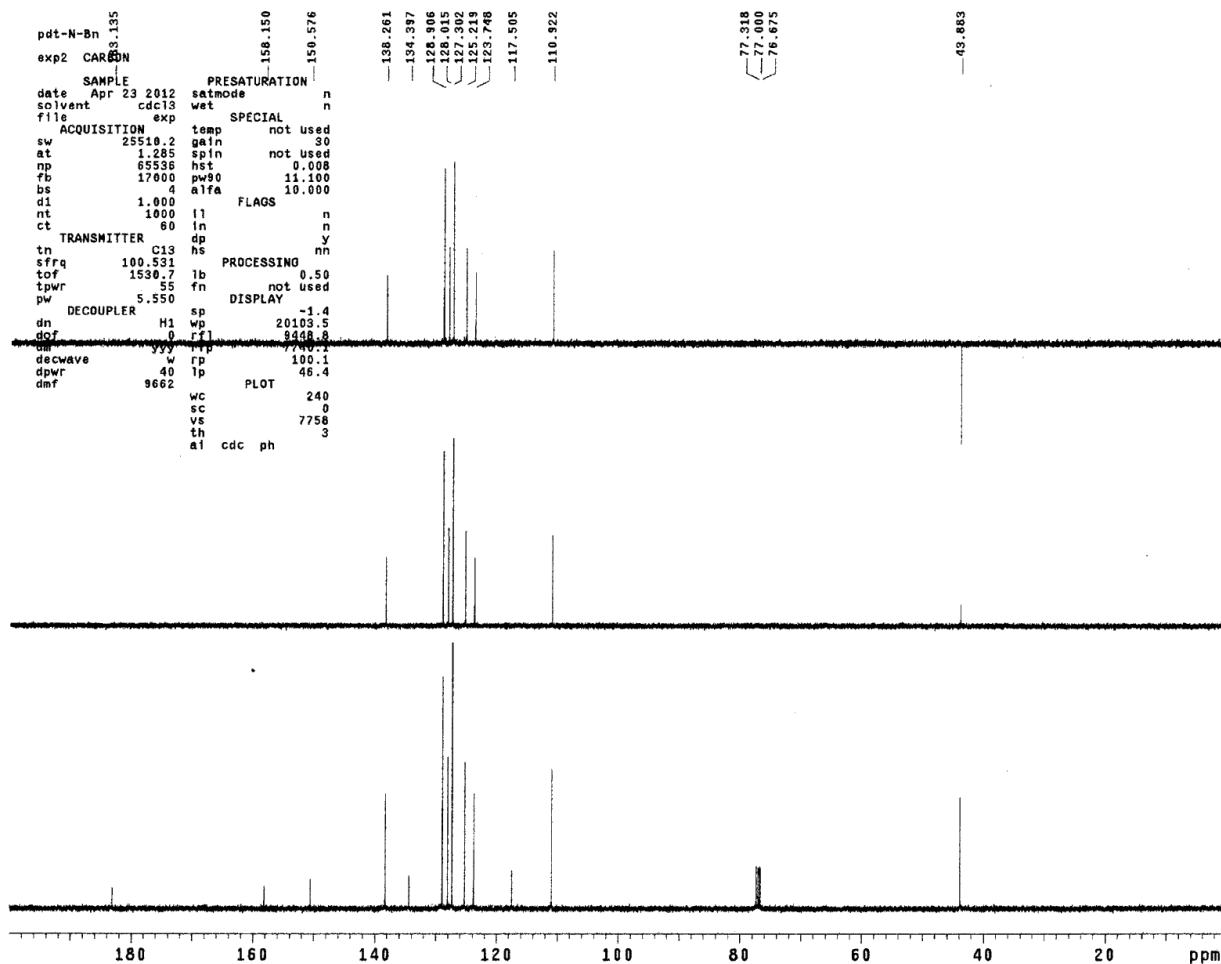

<sup>1</sup>H and <sup>13</sup>C NMR spectra of compound 21

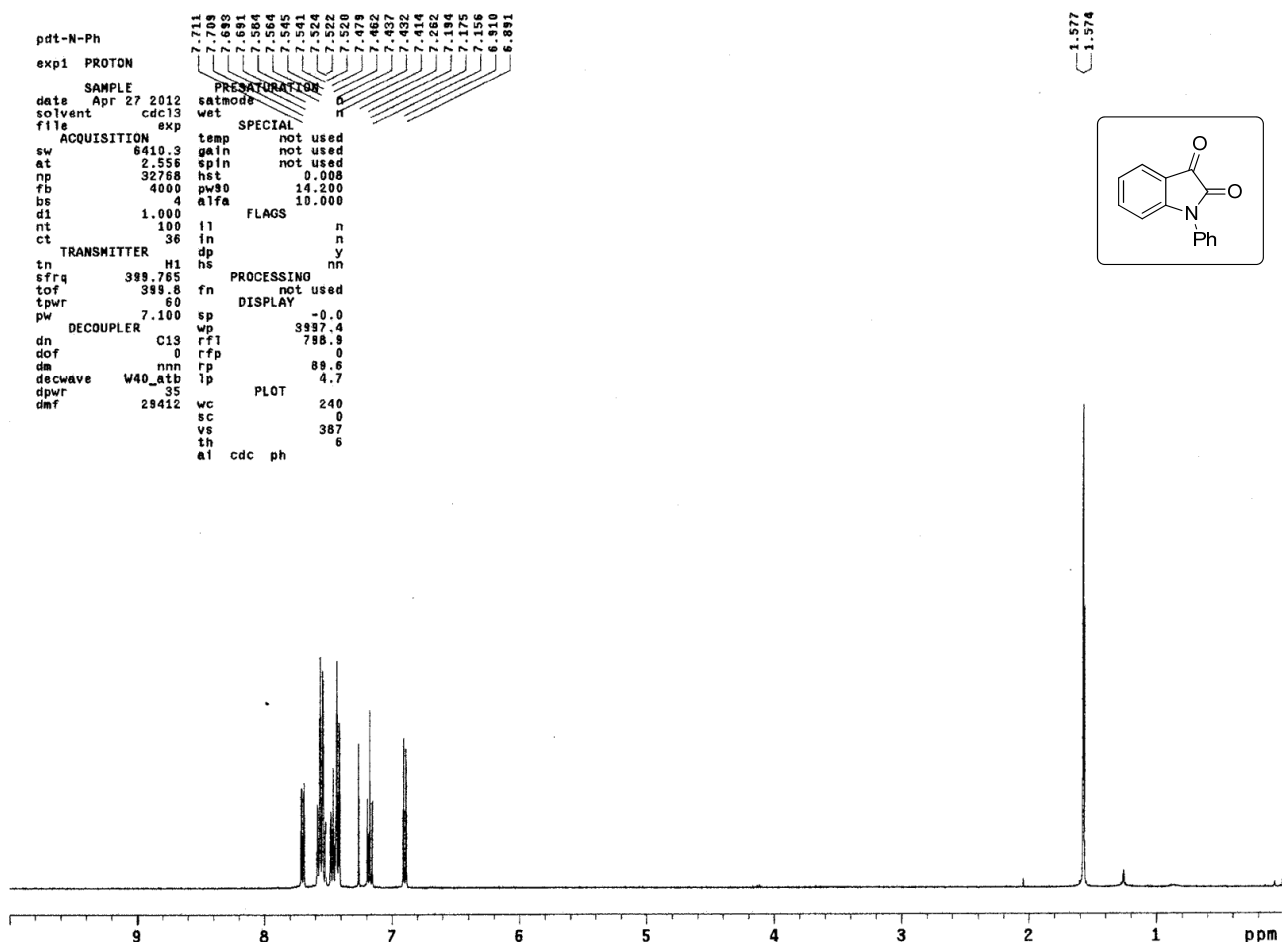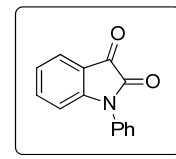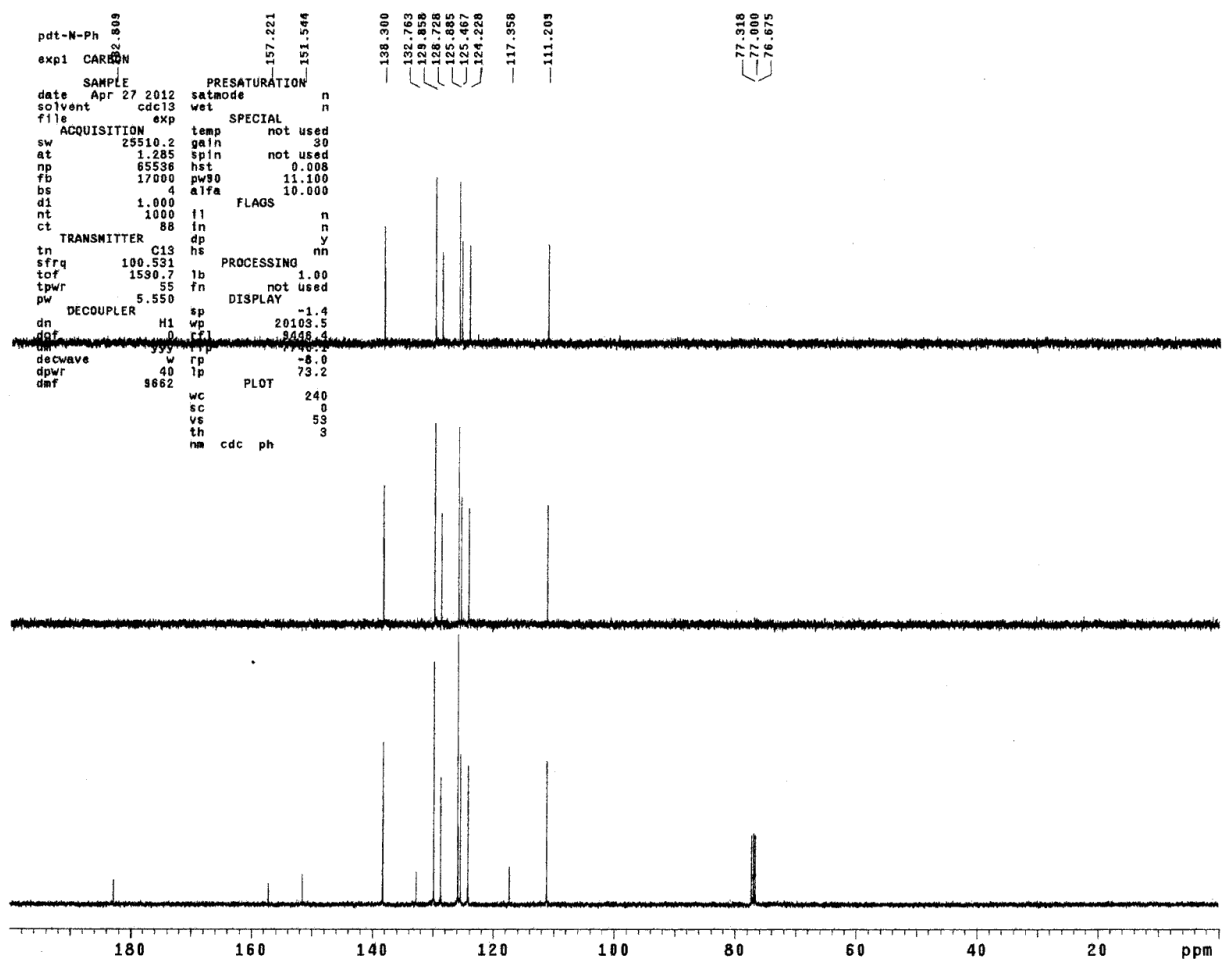

<sup>1</sup>H and <sup>13</sup>C NMR spectra of compound **2m**

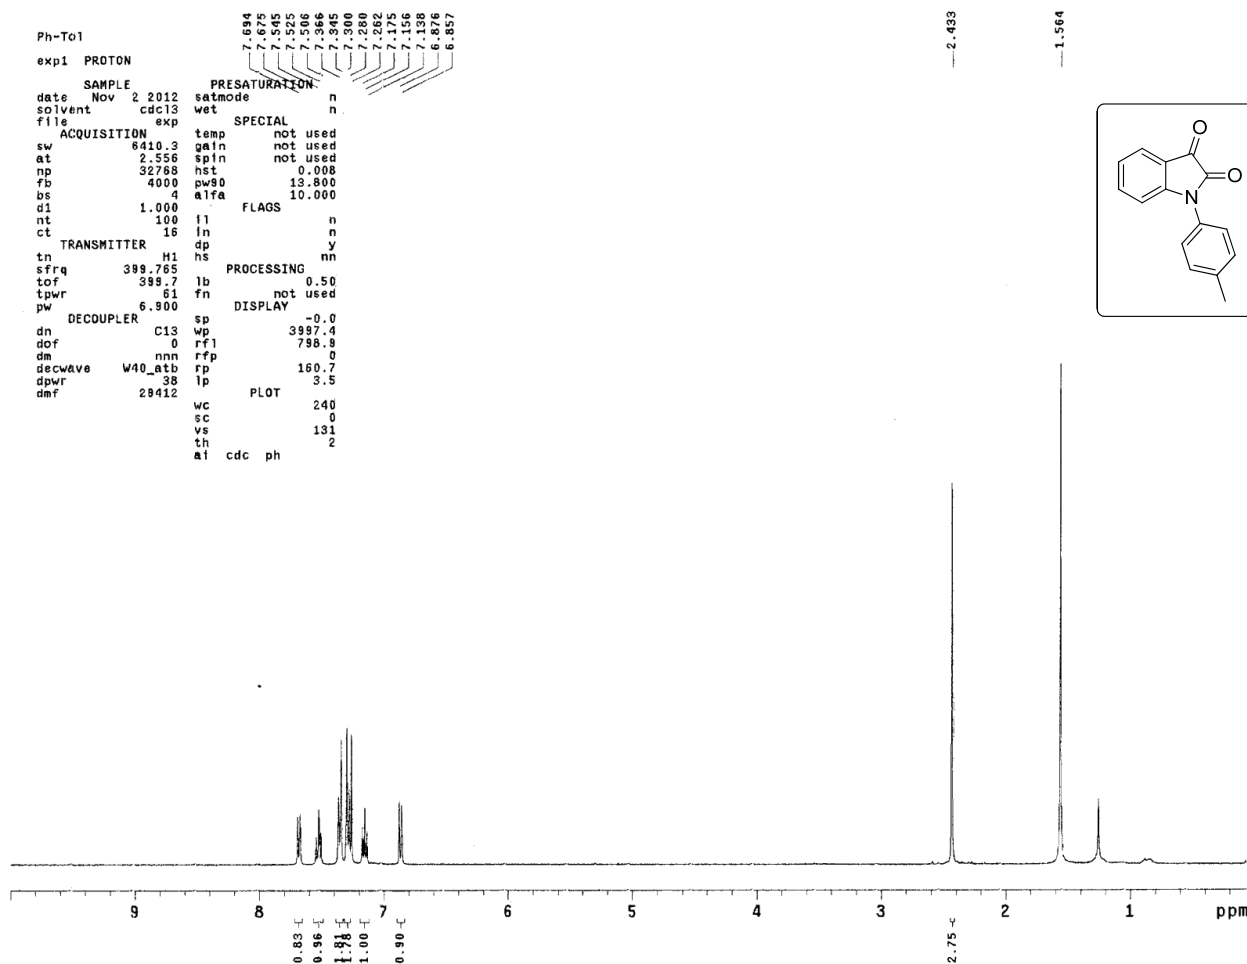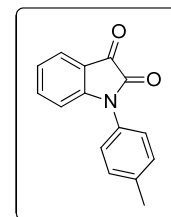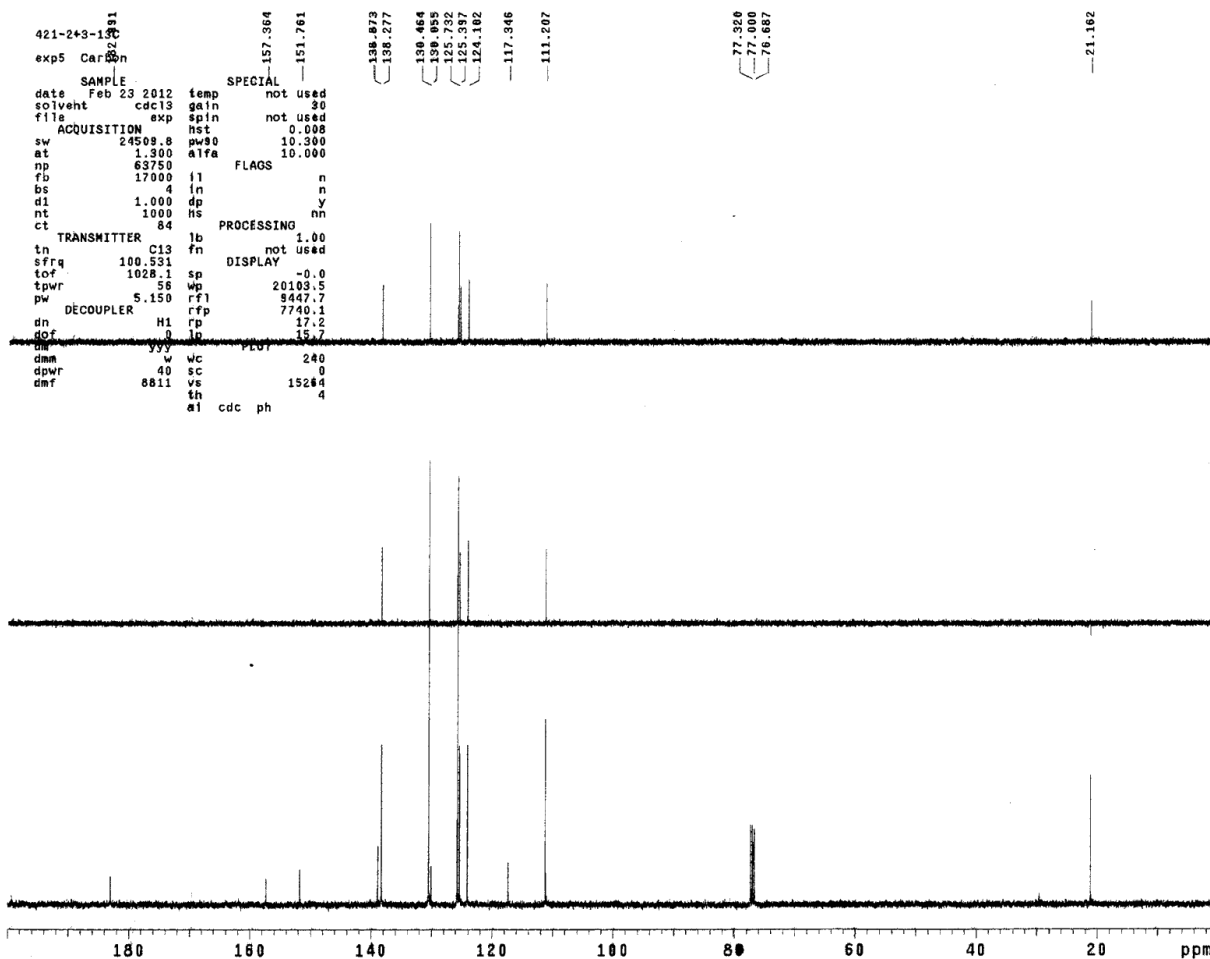

<sup>1</sup>H and <sup>13</sup>C NMR spectra of compound 2n

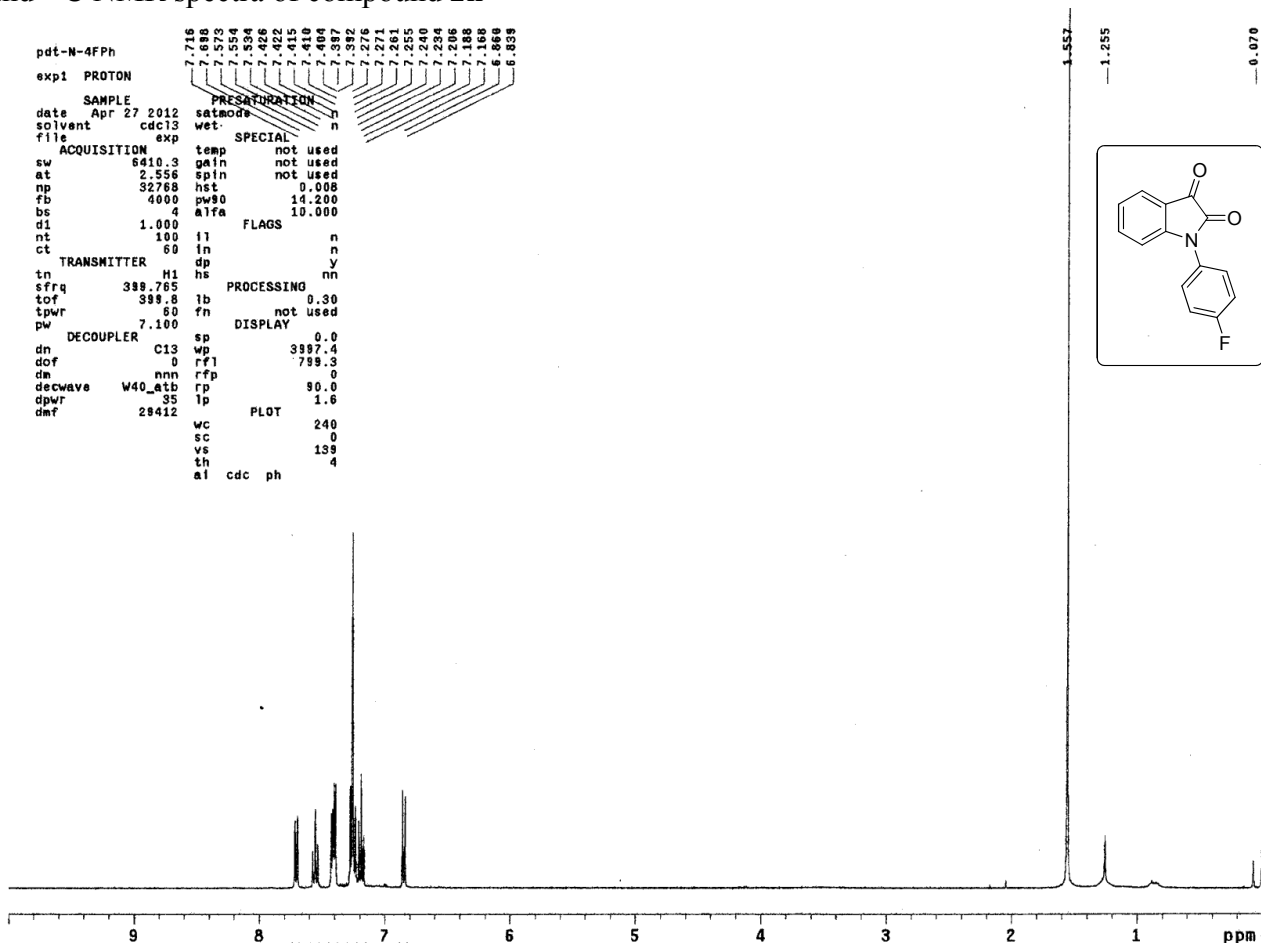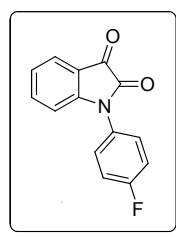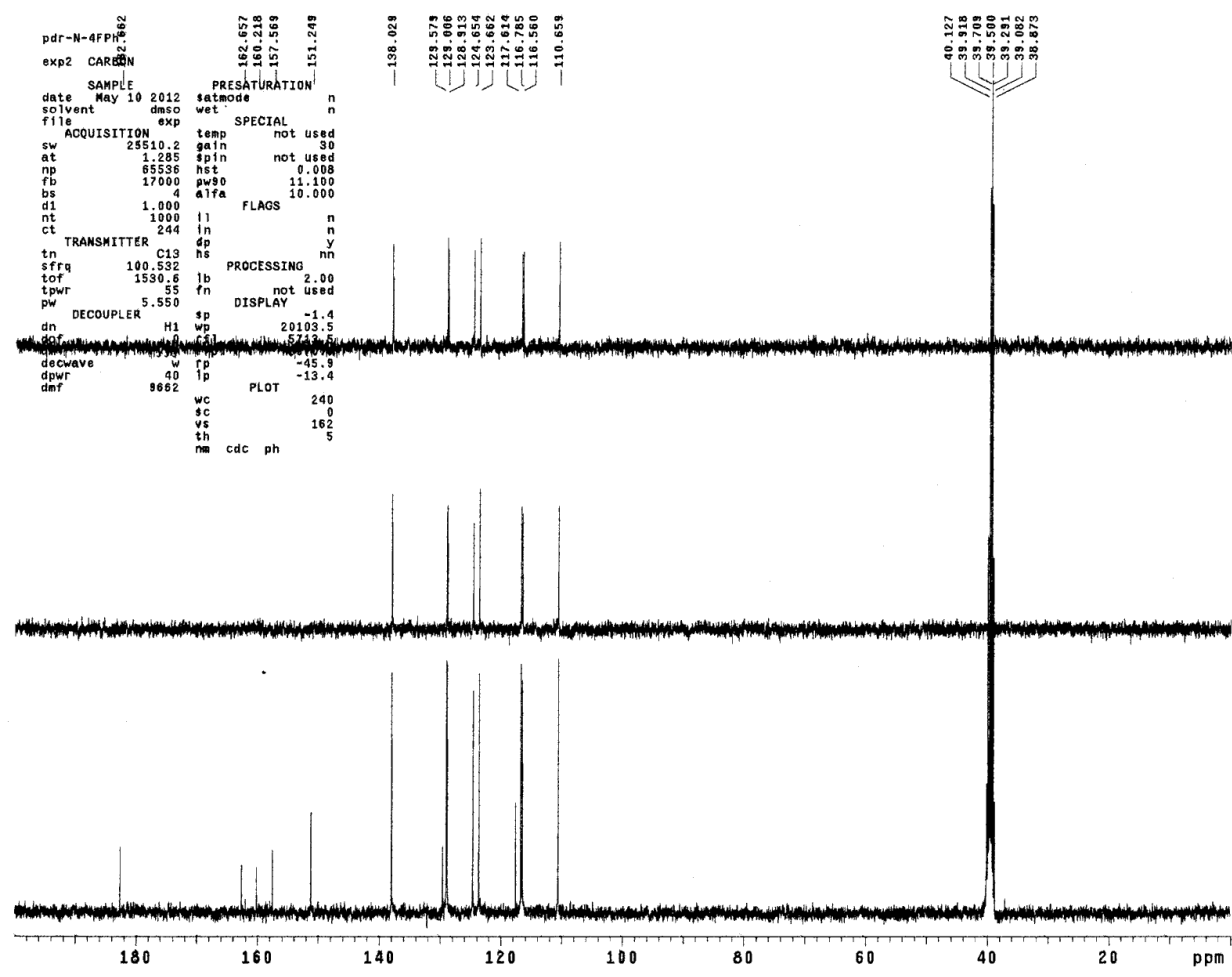

<sup>1</sup>H and <sup>13</sup>C NMR spectra of compound 2o

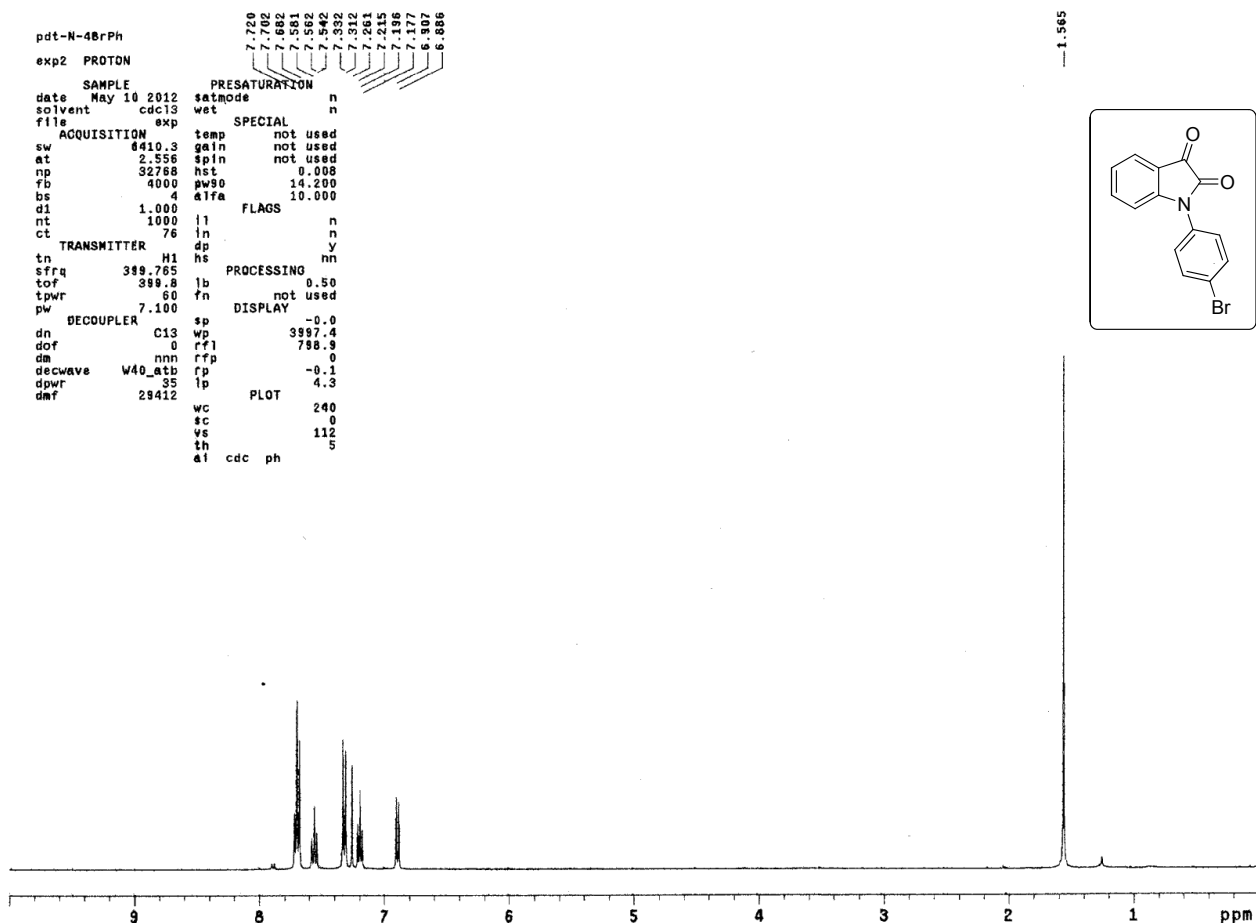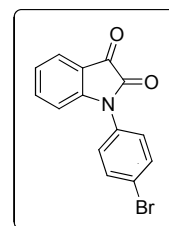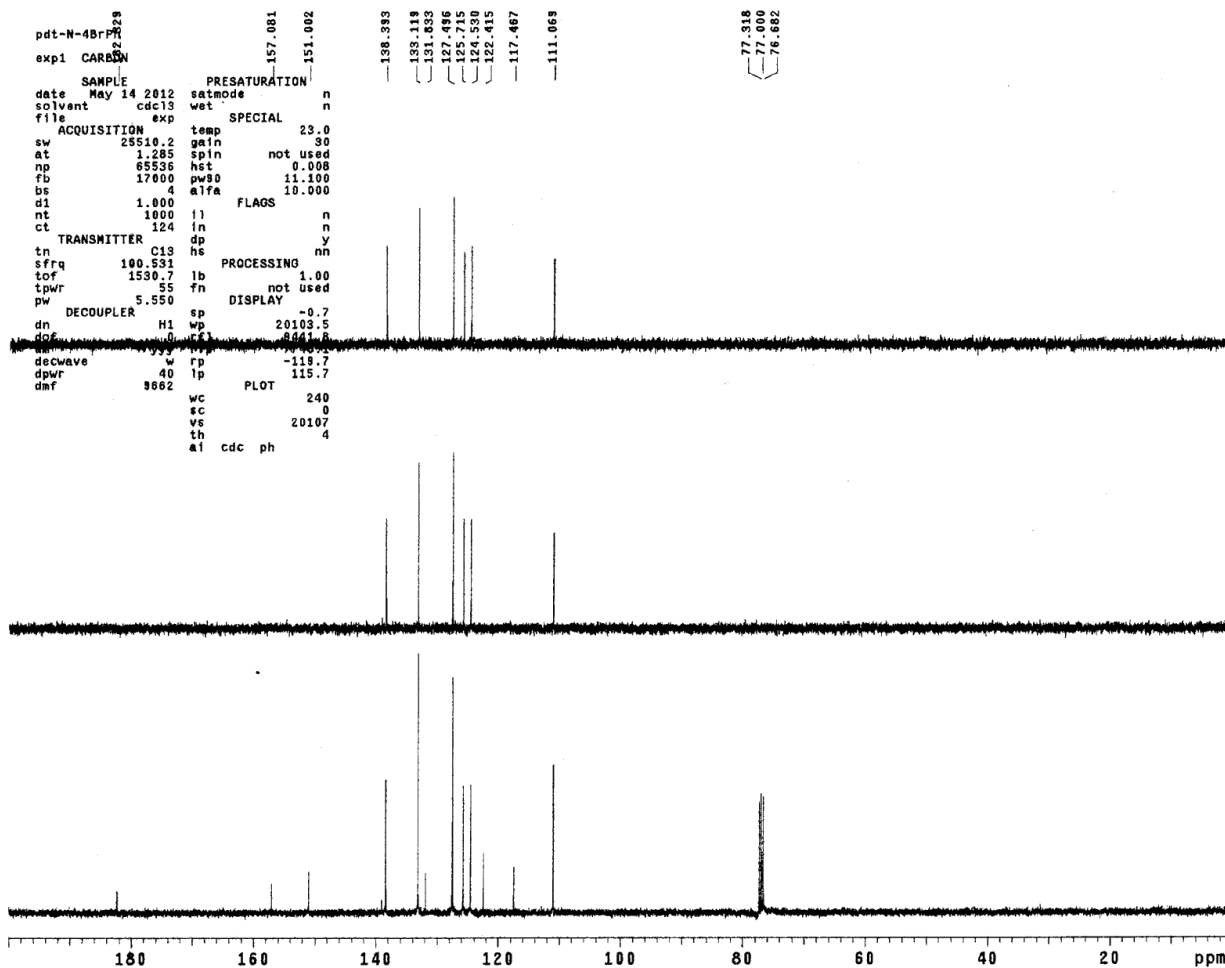

<sup>1</sup>H and <sup>13</sup>C NMR spectra of compound 2p

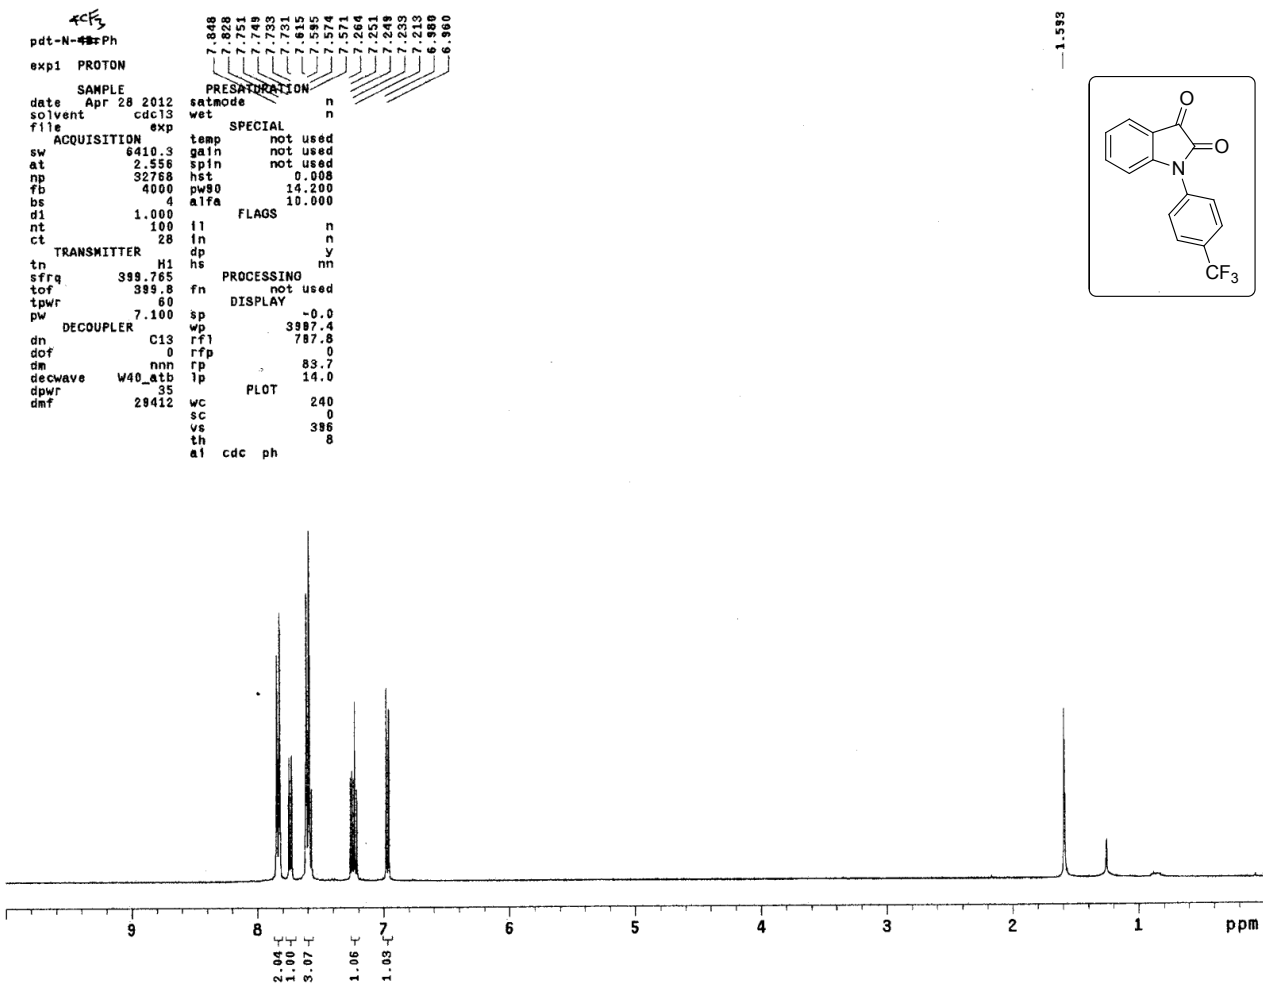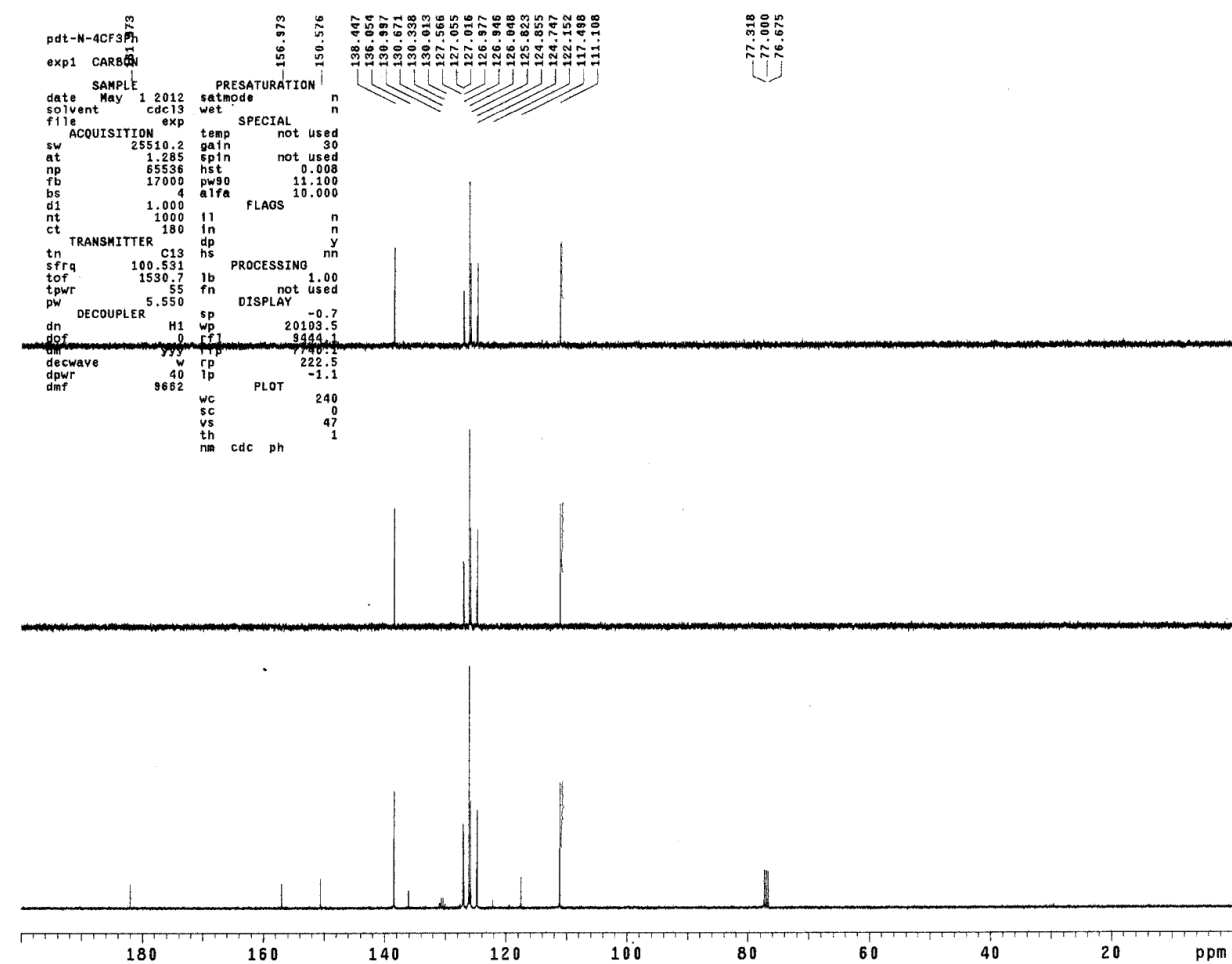

<sup>1</sup>H and <sup>13</sup>C NMR spectra of compound 2q

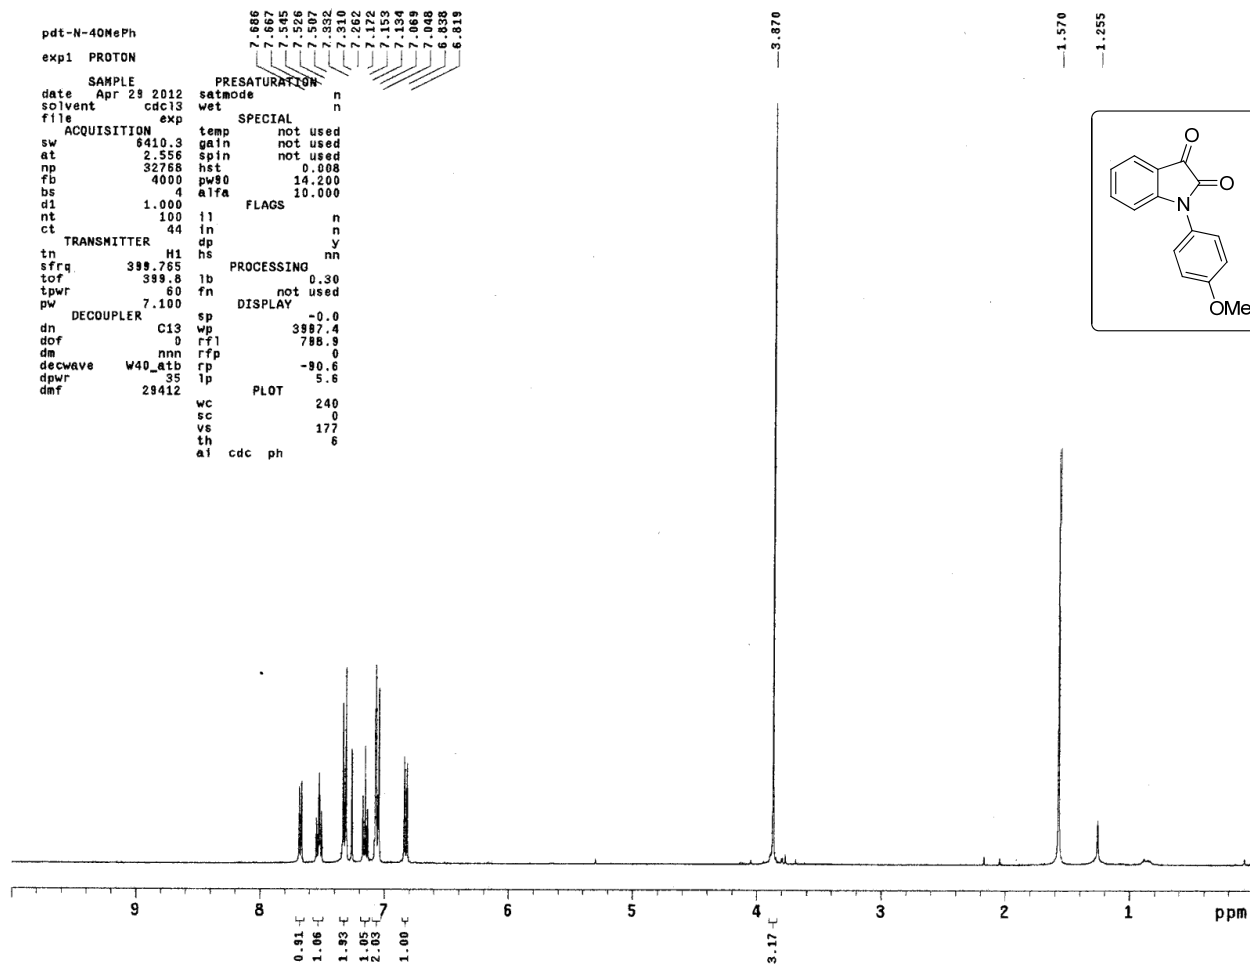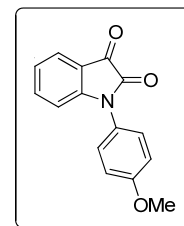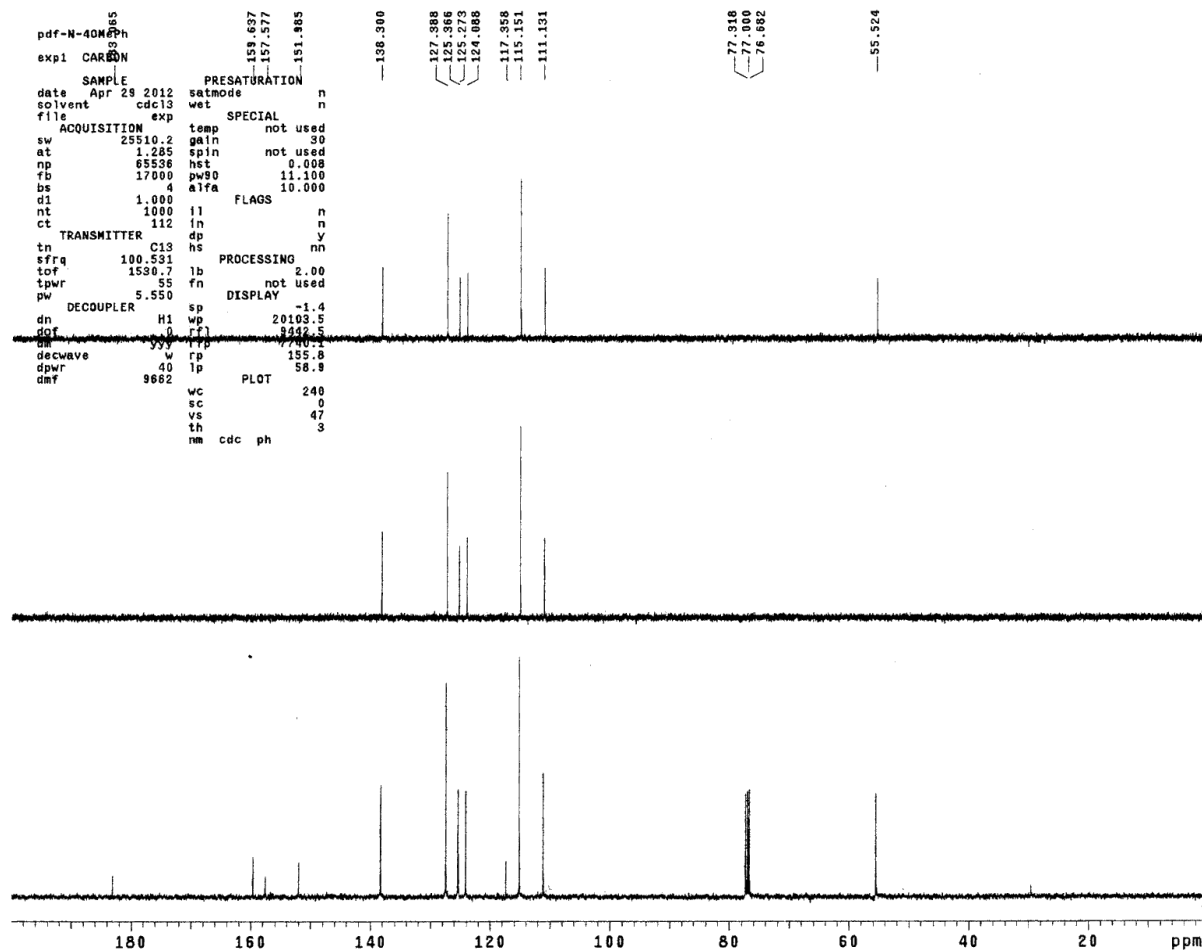

<sup>1</sup>H and <sup>13</sup>C NMR spectra of compound 2r

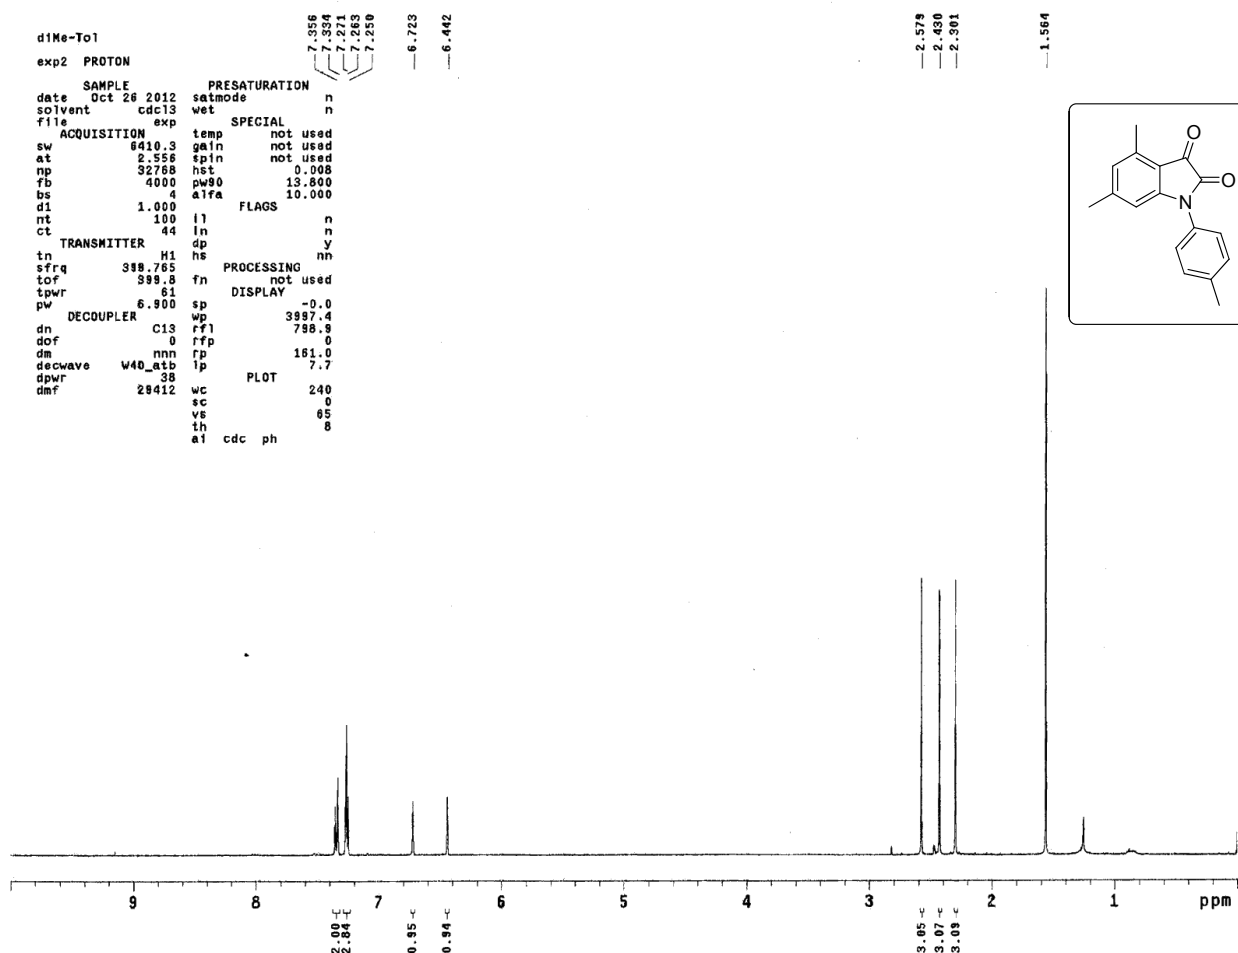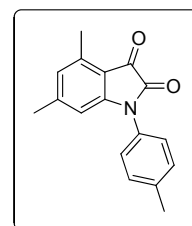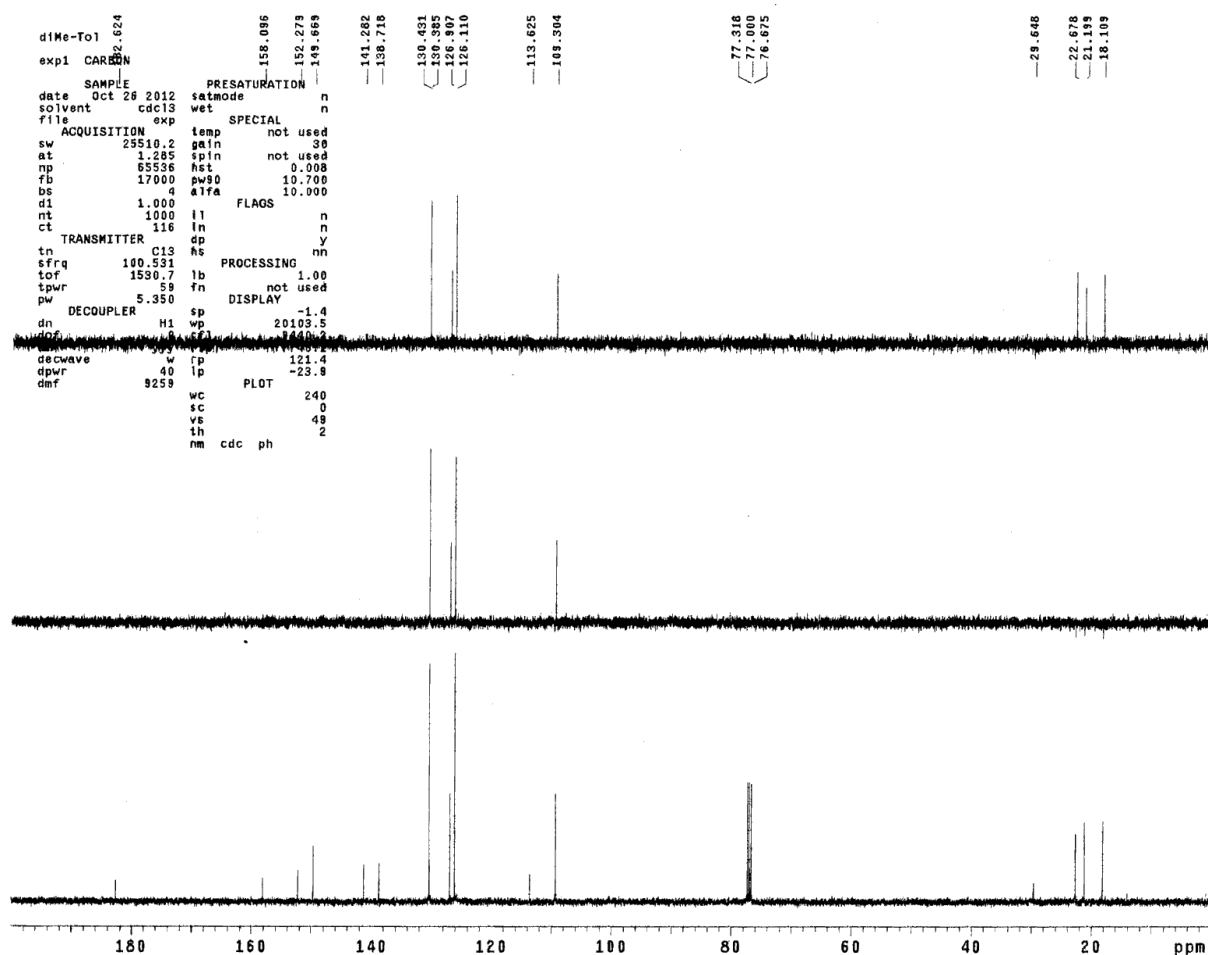



<sup>1</sup>H and <sup>13</sup>C NMR spectra of compound 2s

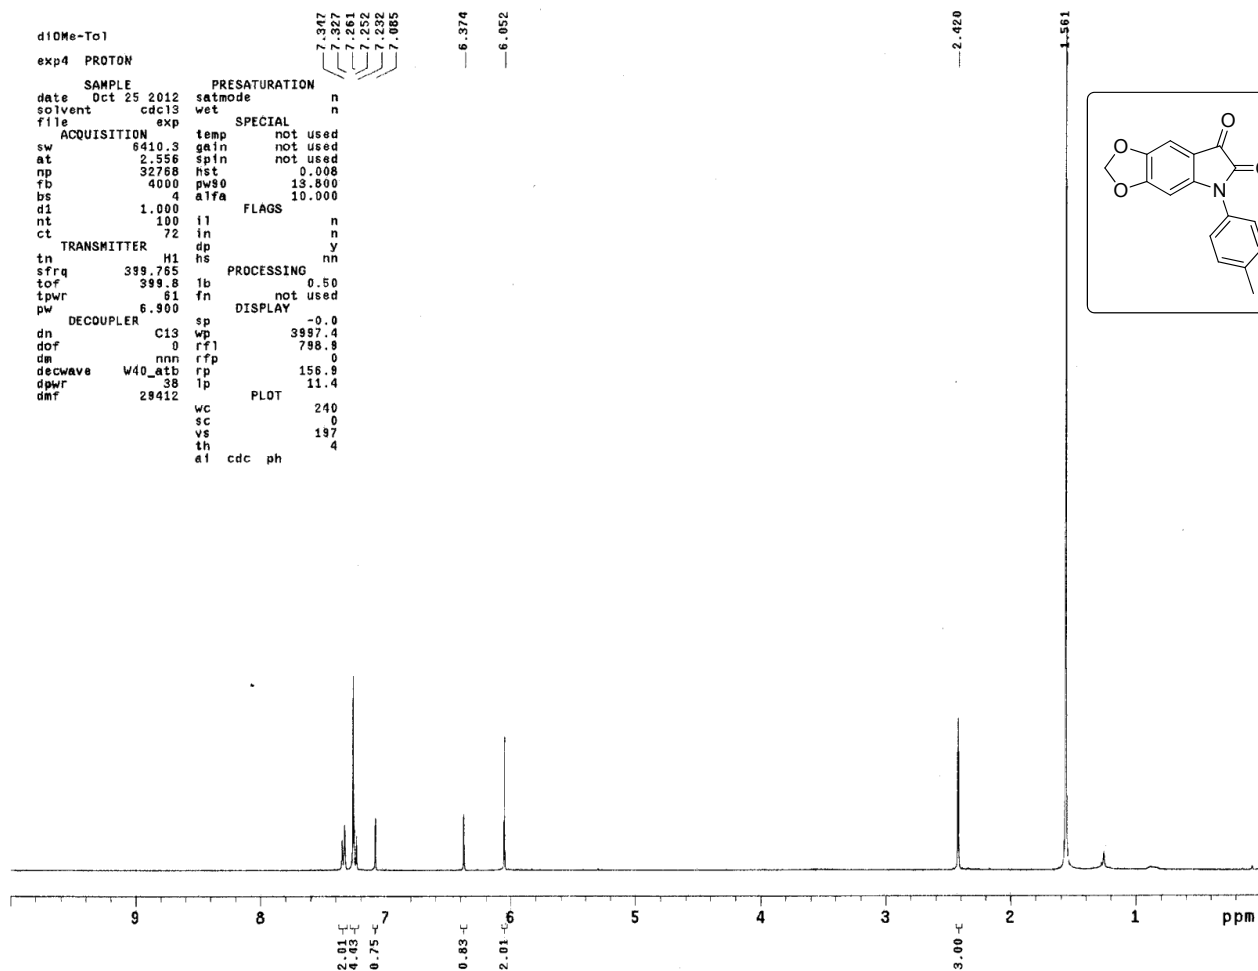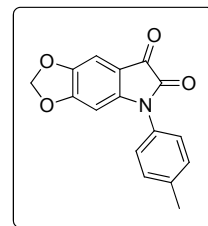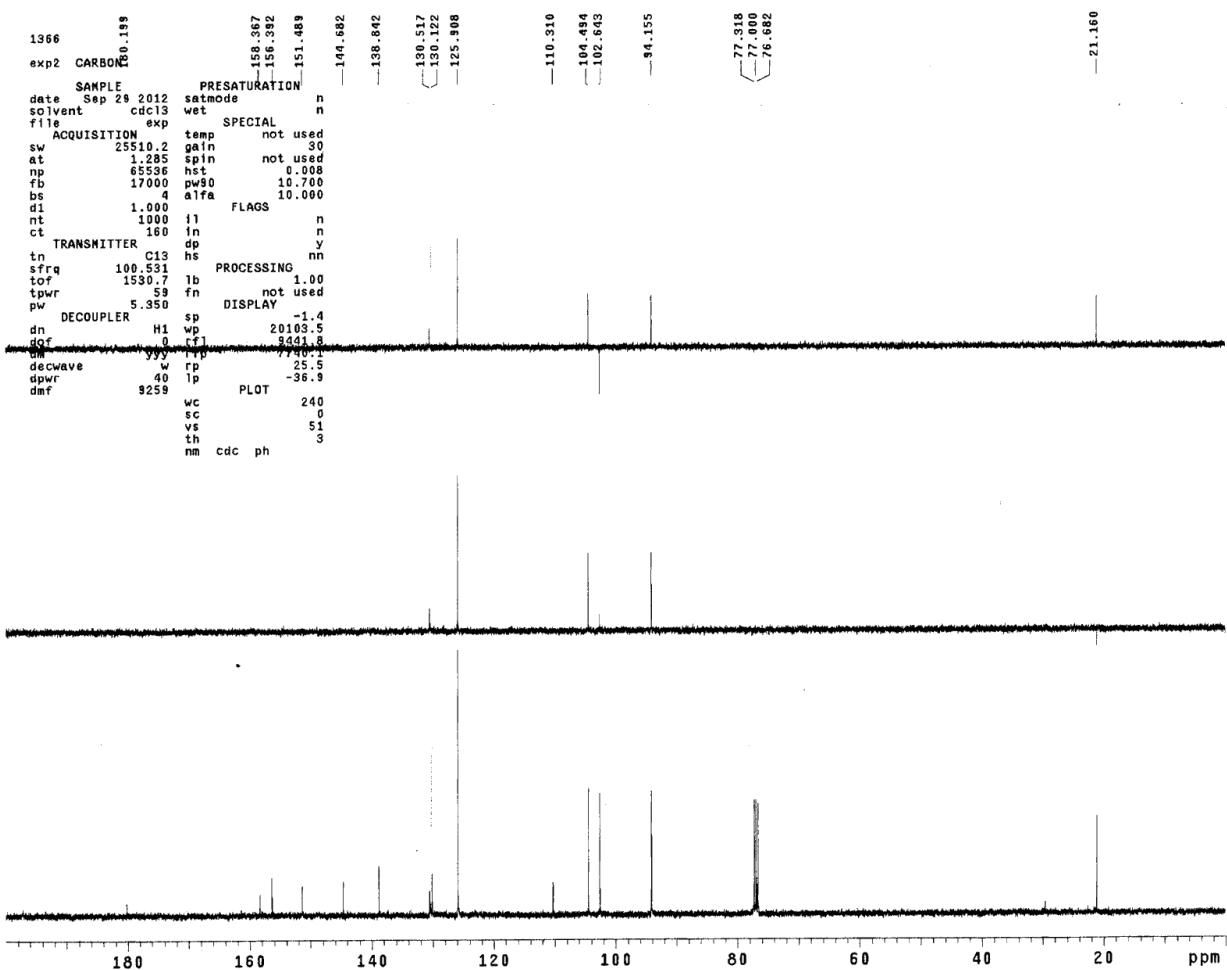

<sup>1</sup>H and <sup>13</sup>C NMR spectra of compound 2t

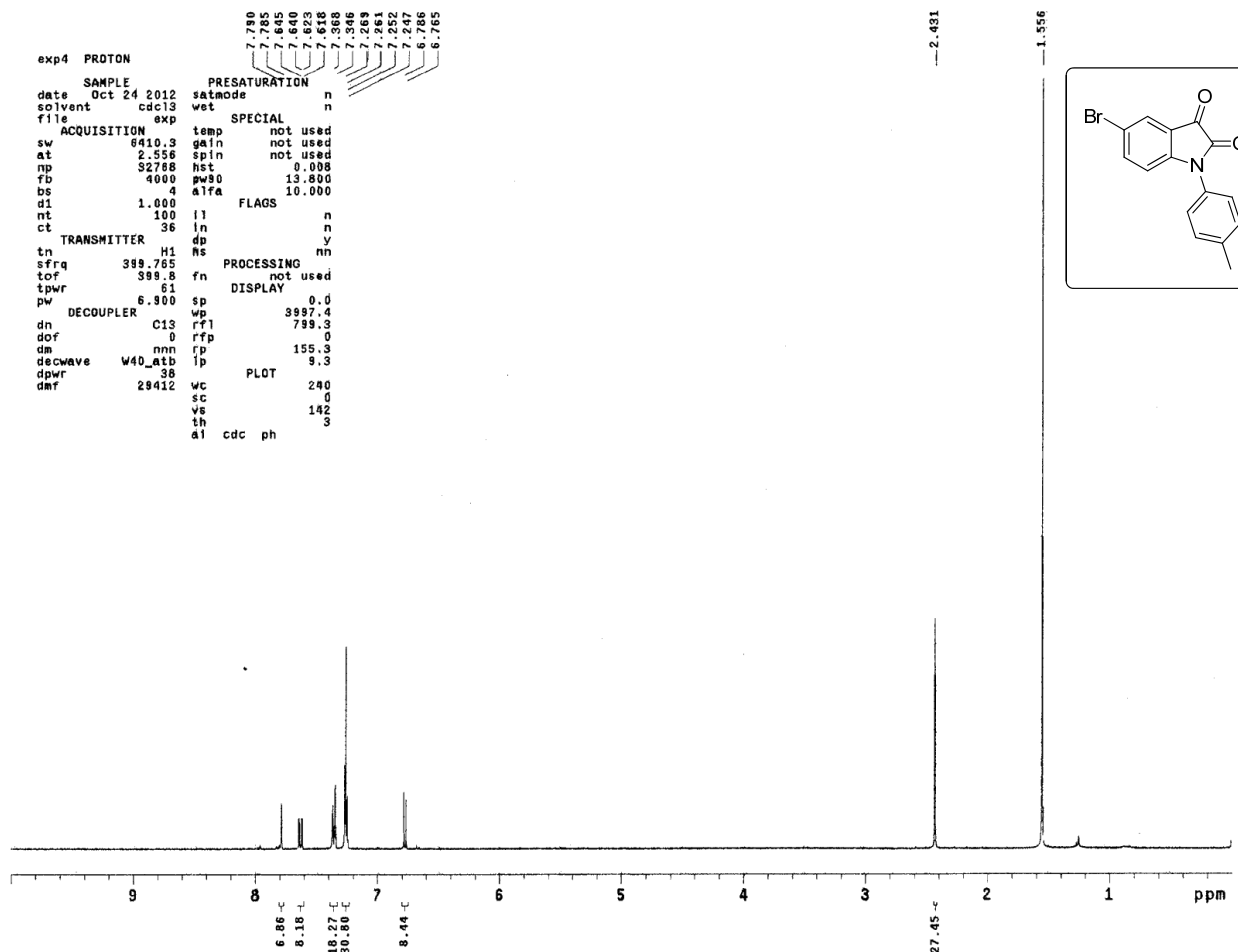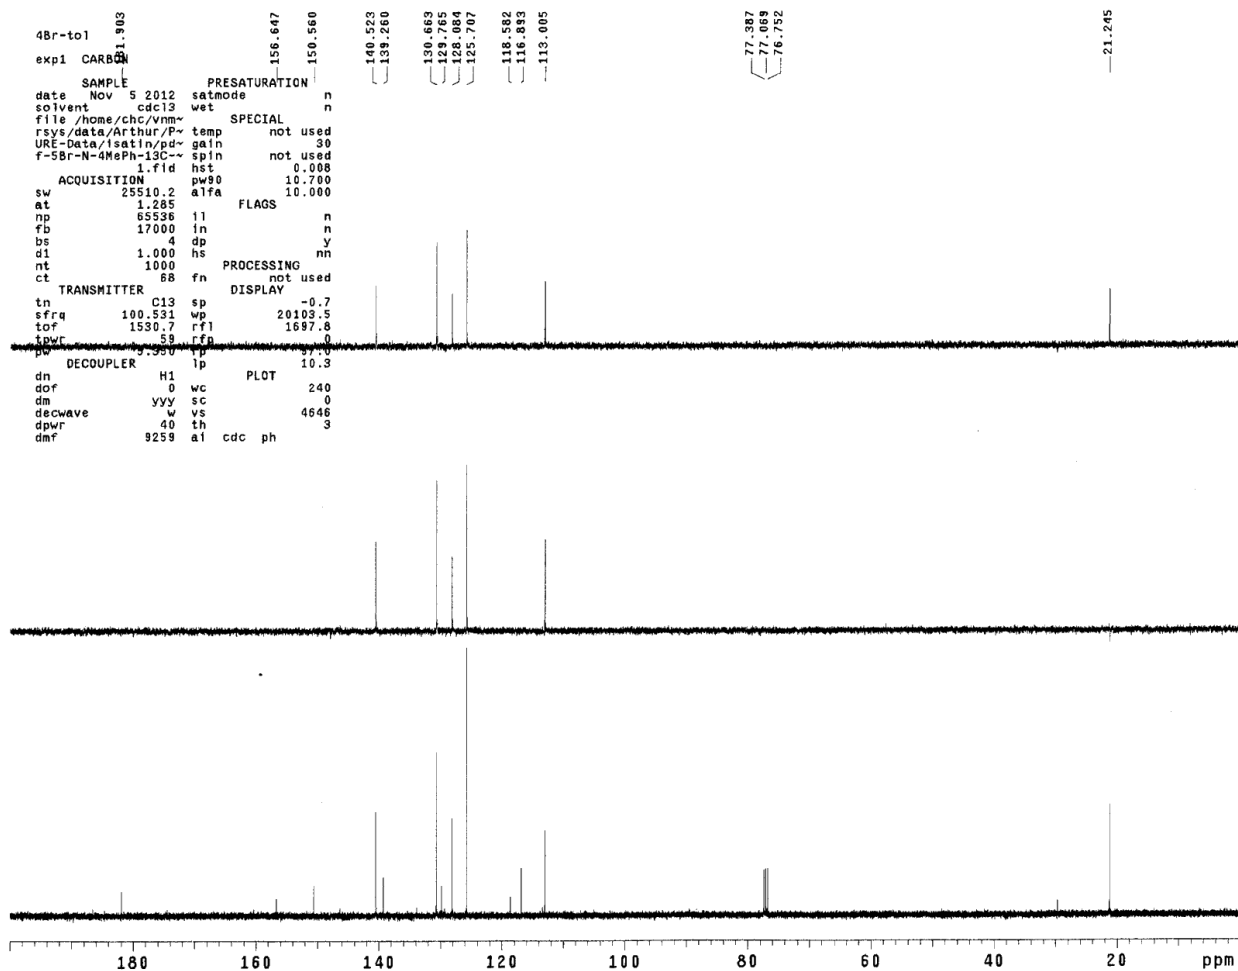

Supplement: c3cc44435j.pdf [file c3cc44435j.pdf]
